# Supplementary material for: Synthesis and antifungal screening of tetramethyl hexahydro-1H-xanthene-1,8(2H)-dione derivatives as potential inhibitors of morphogenesis and biofilm formation inCandida albicans
Source: Royal Society of Chemistry journal article supplement (doi:10.1039/d1nj04168a), 2021-11-29
Supplement: d1nj04168a1.pdf [file d1nj04168a1.pdf]

## Supplementary Data

### **Synthesis and antifungal screening of tetramethyl hexahydro-1H-xanthene-1,8(2H)-dione derivatives as potential inhibitors of morphogenesis and biofilm in *Candida albicans***

Umesh I. Kasabe,<sup>a</sup> Kishor B. Kale,<sup>b</sup> Nitin R. Rode,<sup>b</sup> Amruta V. Shelar,<sup>c</sup> Rajendra H. Patil,<sup>d</sup>  
Pravin C. Mhaske,<sup>e</sup> Manohar G. Chaskar\*<sup>a,f</sup>

<sup>a</sup> Department of Chemistry, Baburaoji Gholap College, Sangvi, Pune-411027, India  
(Affiliated to Savitribai Phule Pune University)

<sup>b</sup> Department of Chemistry, Nowrosjee Wadia College, Pune-411001, India (Affiliated to  
Savitribai Phule Pune University)

<sup>c</sup> Department of Technology, Savitribai Phule Pune University, Pune-411007, India

<sup>d</sup> Department of Biotechnology, Savitribai Phule Pune University, Pune-411007, India

<sup>e</sup> Department of Chemistry, Sir Parashurambhau College, Pune-4110301, India (Affiliated to  
Savitribai Phule Pune University)

<sup>f</sup> Dean, Science and technology, Savitribai Phule Pune University, Pune-411007, India

# Chemistry

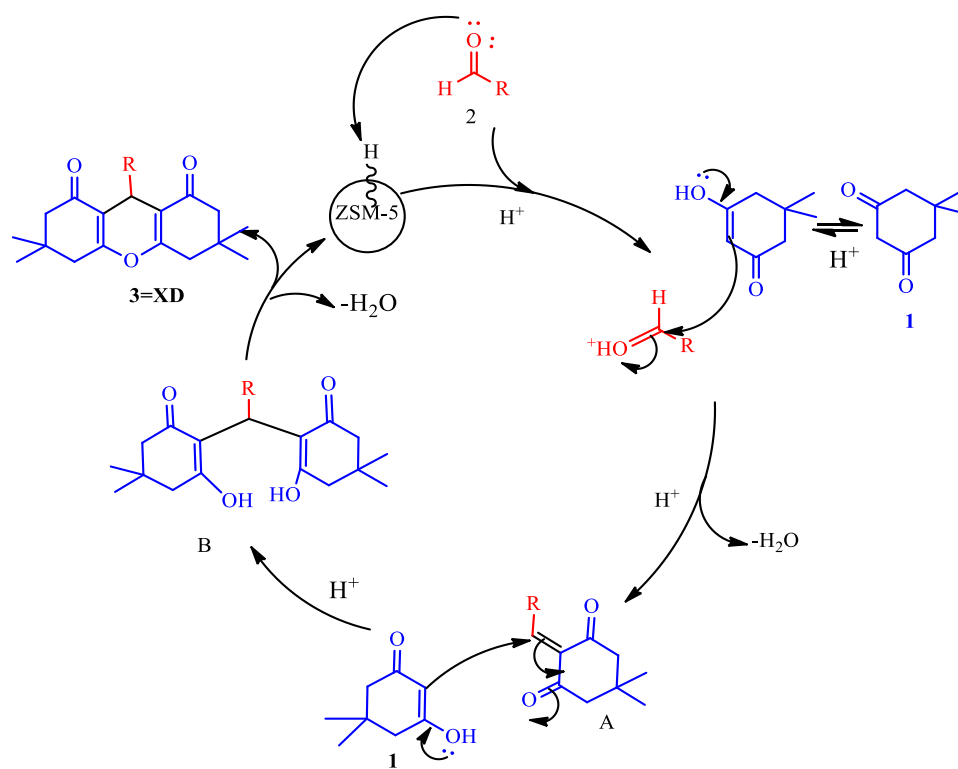

**Scheme S1** The plausible reaction mechanism

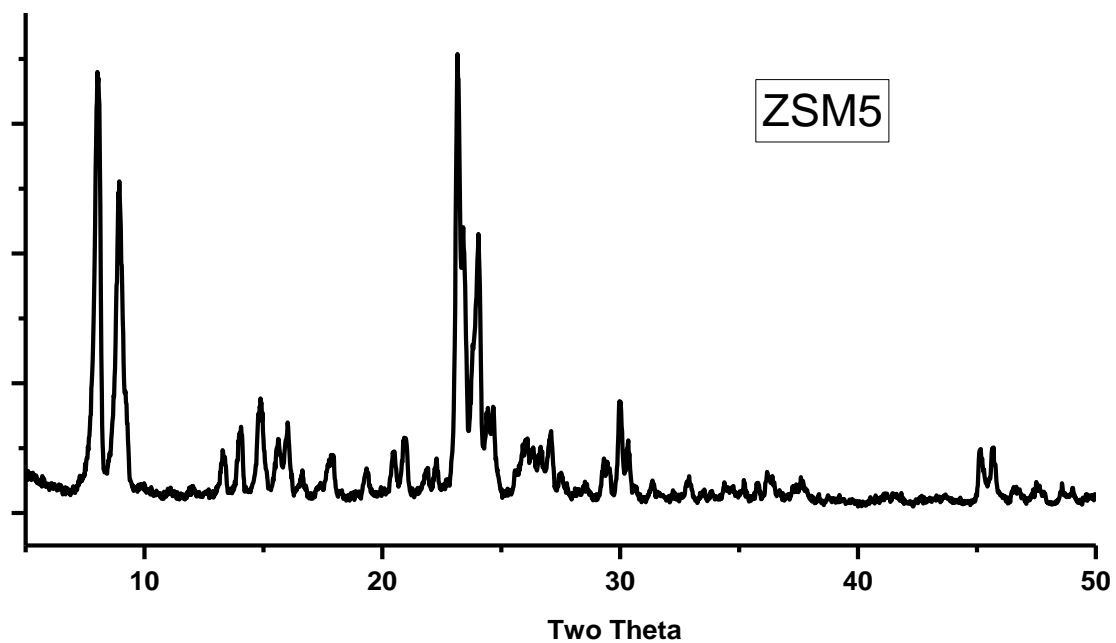

Fig. S1 Powder XRD spectrum of ZSM-5 zeolite

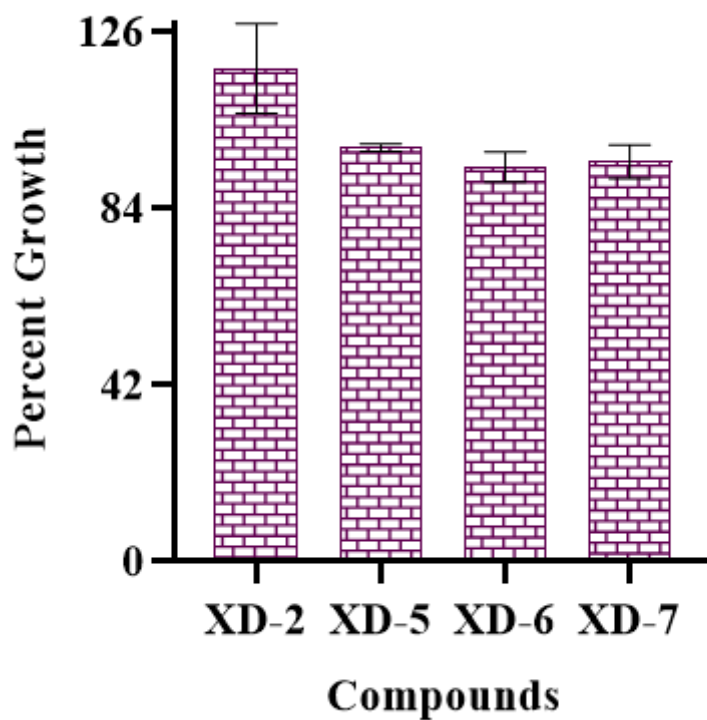

Fig. S2 Cytotoxic study of XD-2, XD-4, XD-5 and XD-6 on HEK 293 cell line: XD derivatives 2, 4, 5 and 6 have shown very less cytotoxicity (8 to 11%).

## Spectral and HPLC Analysis of synthesized compounds

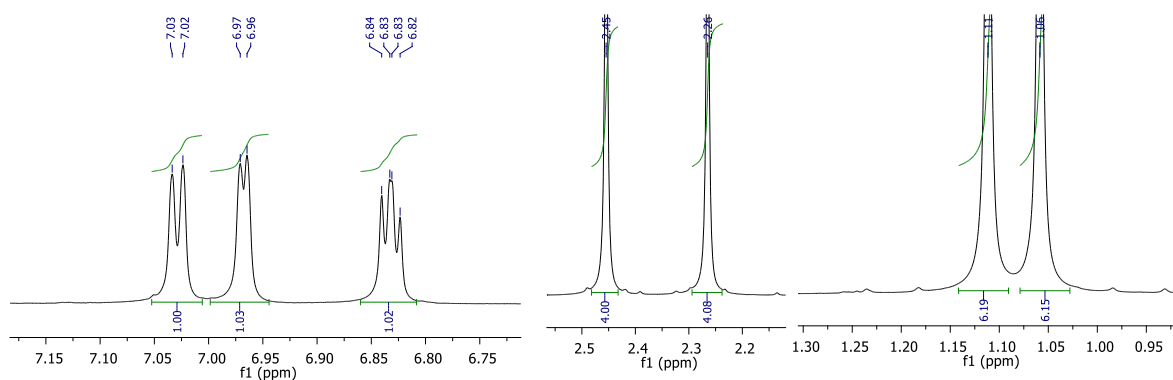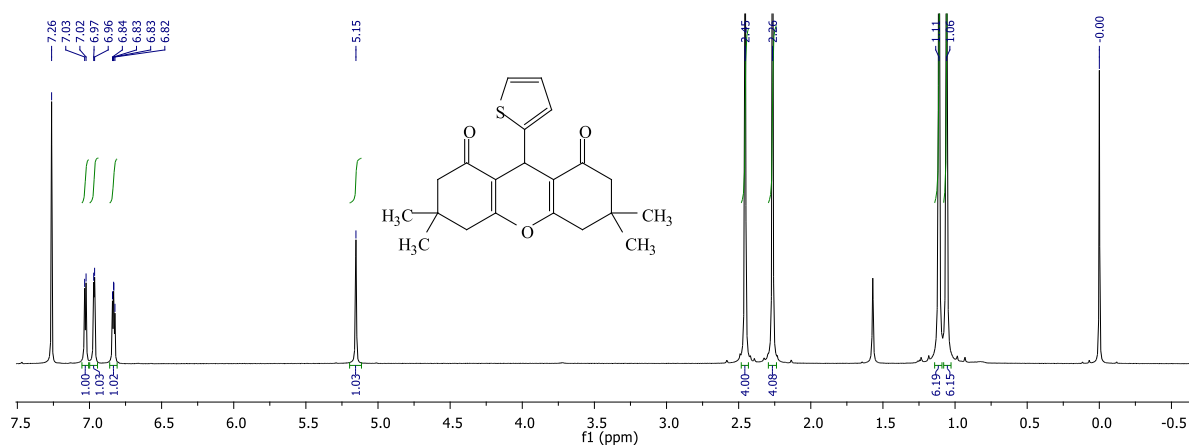

### <sup>1</sup>H NMR (500 MHz, CDCl<sub>3</sub>) of XD-1

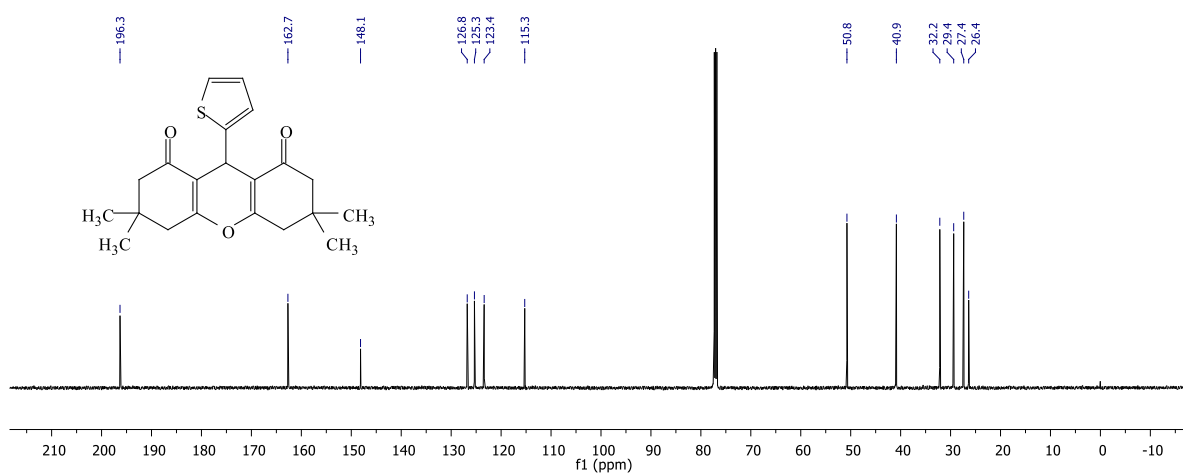

### <sup>13</sup>C NMR (125 MHz, CDCl<sub>3</sub>) of XD-1

Savitribai Phule Pune University - Central Instrumentation Facility

Analysis Info

Analysis Name D:\Data\2021\SPPU\CIF\Umesh\06022021\1\_GB1\_01\_2322.d  
 Method dlc\_ms50-800mz\_10min\_0.120mlflow\_90b.m  
 Sample Name 1  
 Comment

Acquisition Date 2/6/2021 8:04:28 PM  
 Operator CIF  
 Instrument impact HD 1819696.00184

Acquisition Parameter

|             |         |                      |          |                  |           |
|-------------|---------|----------------------|----------|------------------|-----------|
| Source Type | ESI     | Ion Polarity         | Positive | Set Nebulizer    | 1.7 Bar   |
| Focus       | Active  | Set Capillary        | 4500 V   | Set Dry Heater   | 200 °C    |
| Scan Begin  | 50 m/z  | Set End Plate Offset | -500 V   | Set Dry Gas      | 7.0 l/min |
| Scan End    | 800 m/z | Set Charging Voltage | 2000 V   | Set Divert Valve | Source    |
|             |         | Set Corona           | 0 nA     | Set APCI Heater  | 0 °C      |

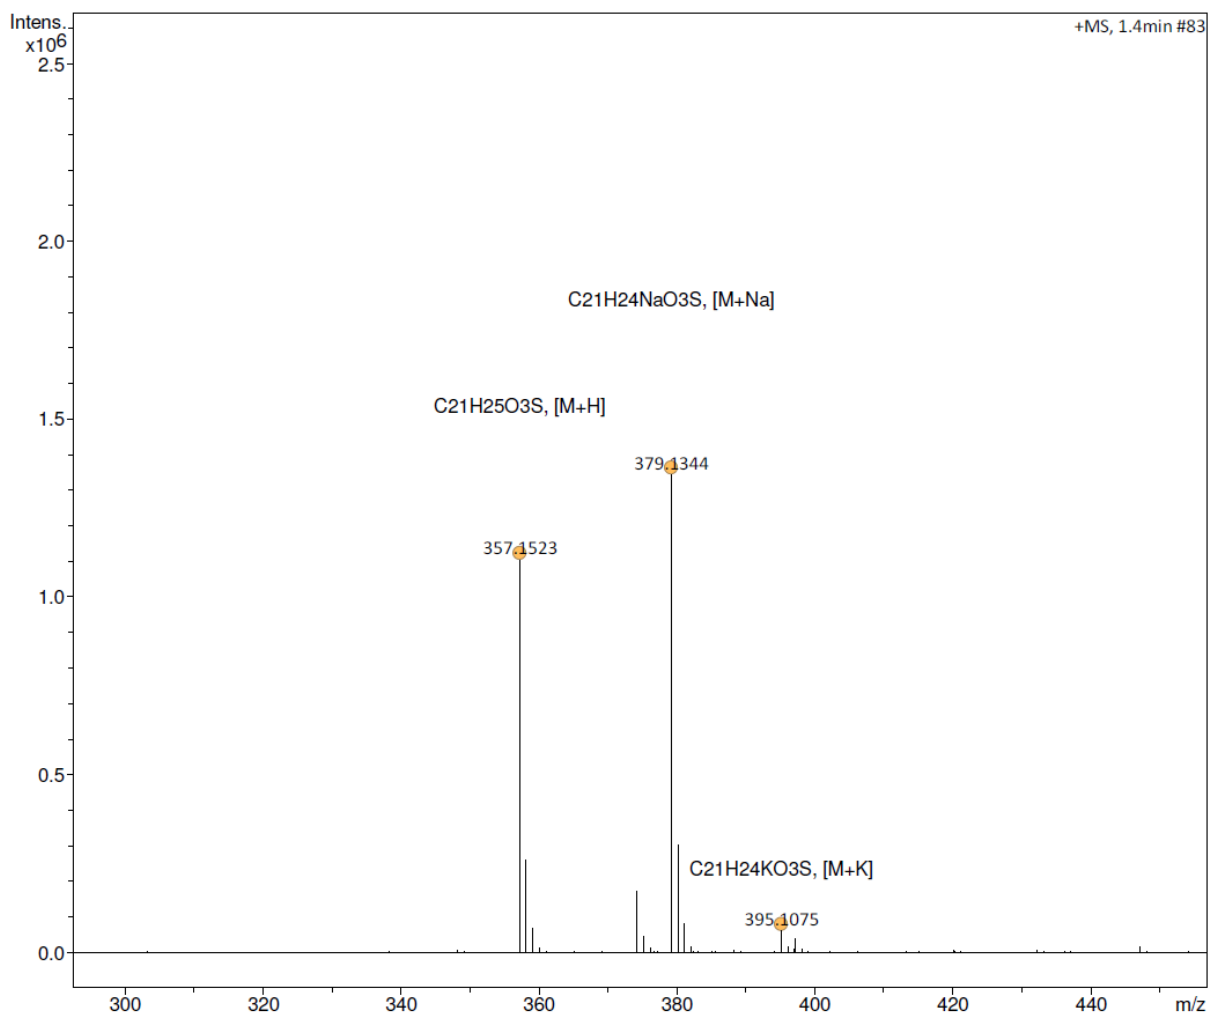

| Meas. m/z  | # | Ion Formula | Score  | m/z        | err [mDa] | err [ppm] | mSigma | rdb | e <sup>-</sup> | Conf | N-Rule | Adduct |
|------------|---|-------------|--------|------------|-----------|-----------|--------|-----|----------------|------|--------|--------|
| 357.152256 | 1 | C21H25O3S   | 100.00 | 357.151892 | -0.4      | -1.0      | 7.6    | 9.5 | even           |      | ok     | M+H    |
| 379.134364 | 1 | C21H24NaO3S | 100.00 | 379.133836 | -0.5      | -1.4      | 11.9   | 9.5 | even           |      | ok     | M+Na   |
| 395.107486 | 1 | C21H24KO3S  | 100.00 | 395.107774 | 0.3       | 0.7       | 21.1   | 9.5 | even           |      | ok     | M+K    |

GB1\_01\_2322.d

Bruker Compass DataAnalysis 4.2

printed: 2/15/2021 1:25:20 PM

by: CIF

Page 1 of 1

HR-MS spectrum of XD-1

SAMPLE INFORMATION

|                                         |              |                     |                                |
|-----------------------------------------|--------------|---------------------|--------------------------------|
| Sample Name:                            | 1            | Acquired By:        | System                         |
| Sample Type:                            | Unknown      | Sample Set Name:    | 09042021                       |
| Vial:                                   | 11           | Acq. Method Set:    | CIF                            |
| Injection #:                            | 1            | Processing Method:  | 1                              |
| Injection Volume:                       | 10.00 ul     | Channel Name:       | PDA Max Plot 190.0 - 800.0     |
| Run Time:                               | 10.0 Minutes | Proc. Chnl. Descr.: | W2996 PDA MaxPlot (190.0 nm to |
| Date Acquired: 09-04-2021 16:33:17 IST  |              |                     |                                |
| Date Processed: 09-04-2021 18:00:55 IST |              |                     |                                |

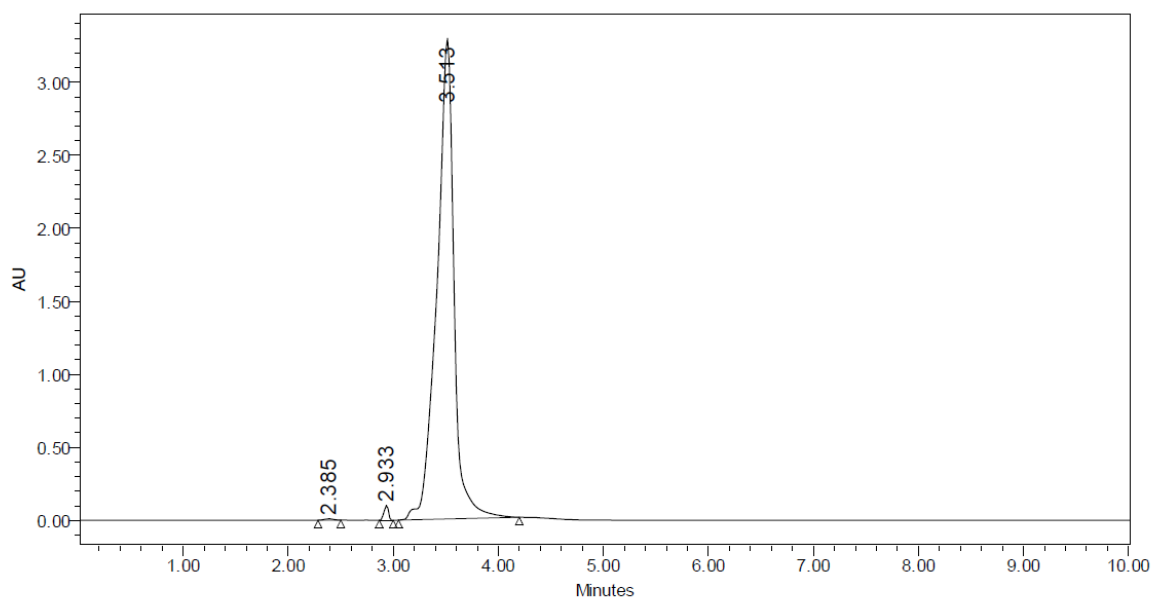

|   | RT    | Area     | % Area | Height  |
|---|-------|----------|--------|---------|
| 1 | 2.385 | 51440    | 0.14   | 9141    |
| 2 | 2.933 | 301844   | 0.80   | 97094   |
| 3 | 3.513 | 37212930 | 99.06  | 3289638 |

Reported by User: System  
 Report Method: S P PUNE UNIVERSITY  
 Report Method ID 2116  
 Page: 1 of 1

Project Name: Defaults\1.8  
 Date Printed: 09-04-2021  
 18:01:12 Asia/Kolkata

HPLC spectrum of XD-1

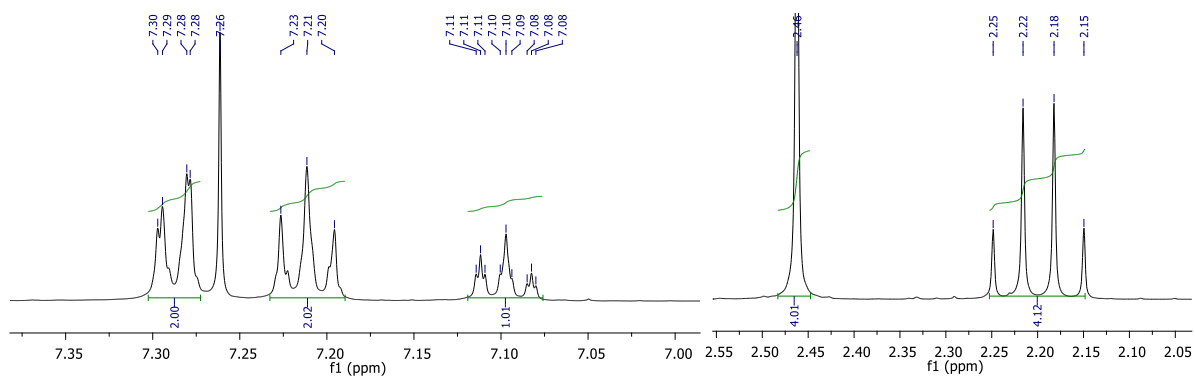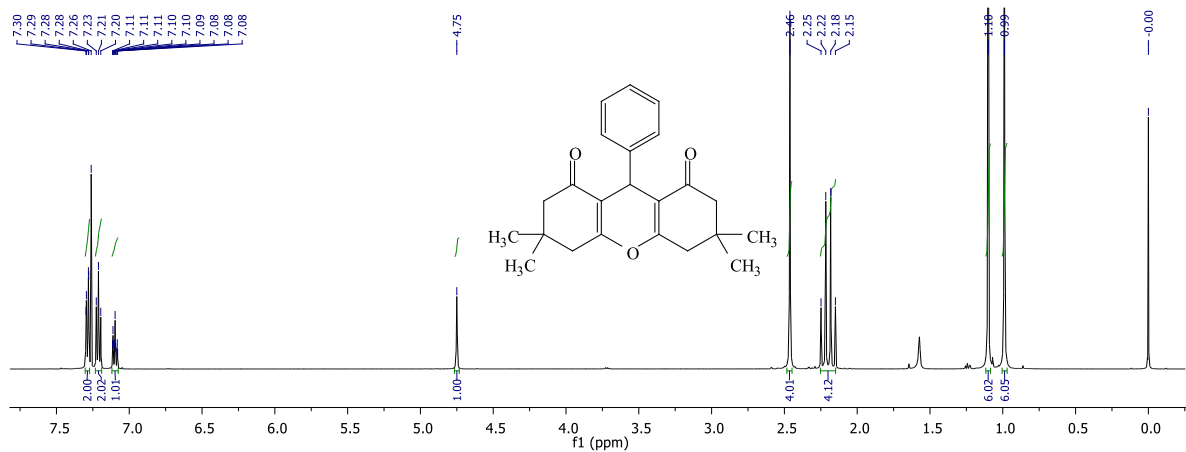

$^1\text{H}$  NMR (500 MHz,  $\text{CDCl}_3$ ) of XD-2

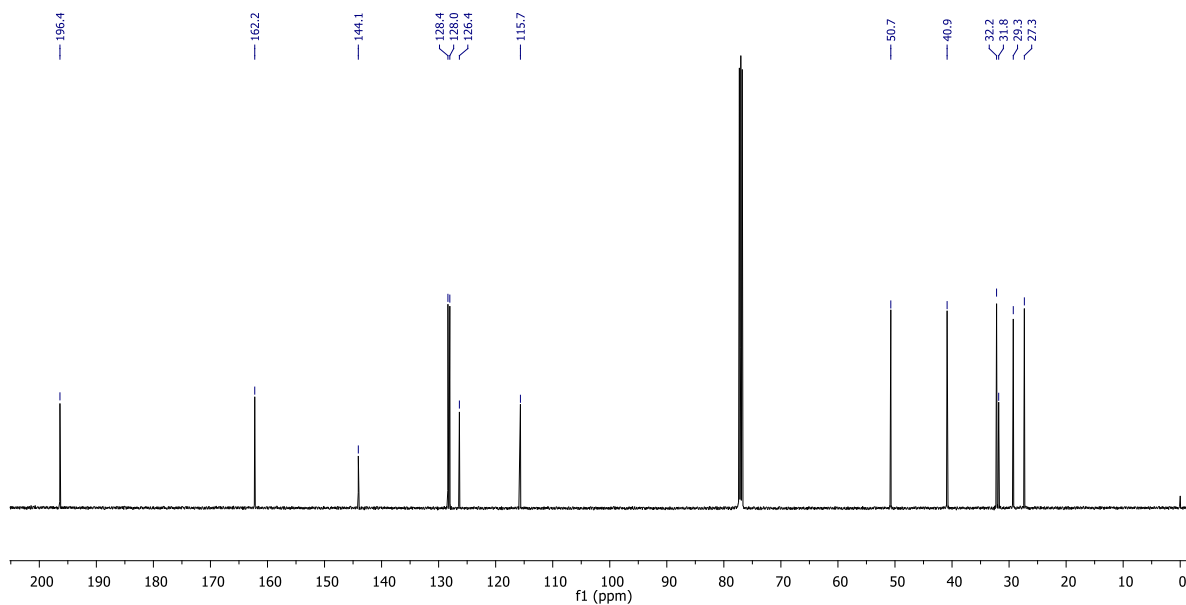

$^{13}\text{C}$  NMR (125 MHz,  $\text{CDCl}_3$ ) of XD-2

**Savitribai Phule Pune University - Central Instrumentation Facility**

**Analysis Info**

|               |                                                         |                  |                         |
|---------------|---------------------------------------------------------|------------------|-------------------------|
| Analysis Name | D:\Data\2021\SPPU\CIF\Umesh\06022021\05-A_GA7_01_2320.d | Acquisition Date | 2/6/2021 7:43:06 PM     |
| Method        | dlc_ms50-800mz_10min_0.120mlflow_90b.m                  | Operator         | CIF                     |
| Sample Name   | 05-A                                                    | Instrument       | impact HD 1819696.00184 |
| Comment       |                                                         |                  |                         |

**Acquisition Parameter**

|             |         |                      |          |                  |           |
|-------------|---------|----------------------|----------|------------------|-----------|
| Source Type | ESI     | Ion Polarity         | Positive | Set Nebulizer    | 1.7 Bar   |
| Focus       | Active  | Set Capillary        | 4500 V   | Set Dry Heater   | 200 °C    |
| Scan Begin  | 50 m/z  | Set End Plate Offset | -500 V   | Set Dry Gas      | 7.0 l/min |
| Scan End    | 800 m/z | Set Charging Voltage | 2000 V   | Set Divert Valve | Source    |
|             |         | Set Corona           | 0 nA     | Set APCI Heater  | 0 °C      |

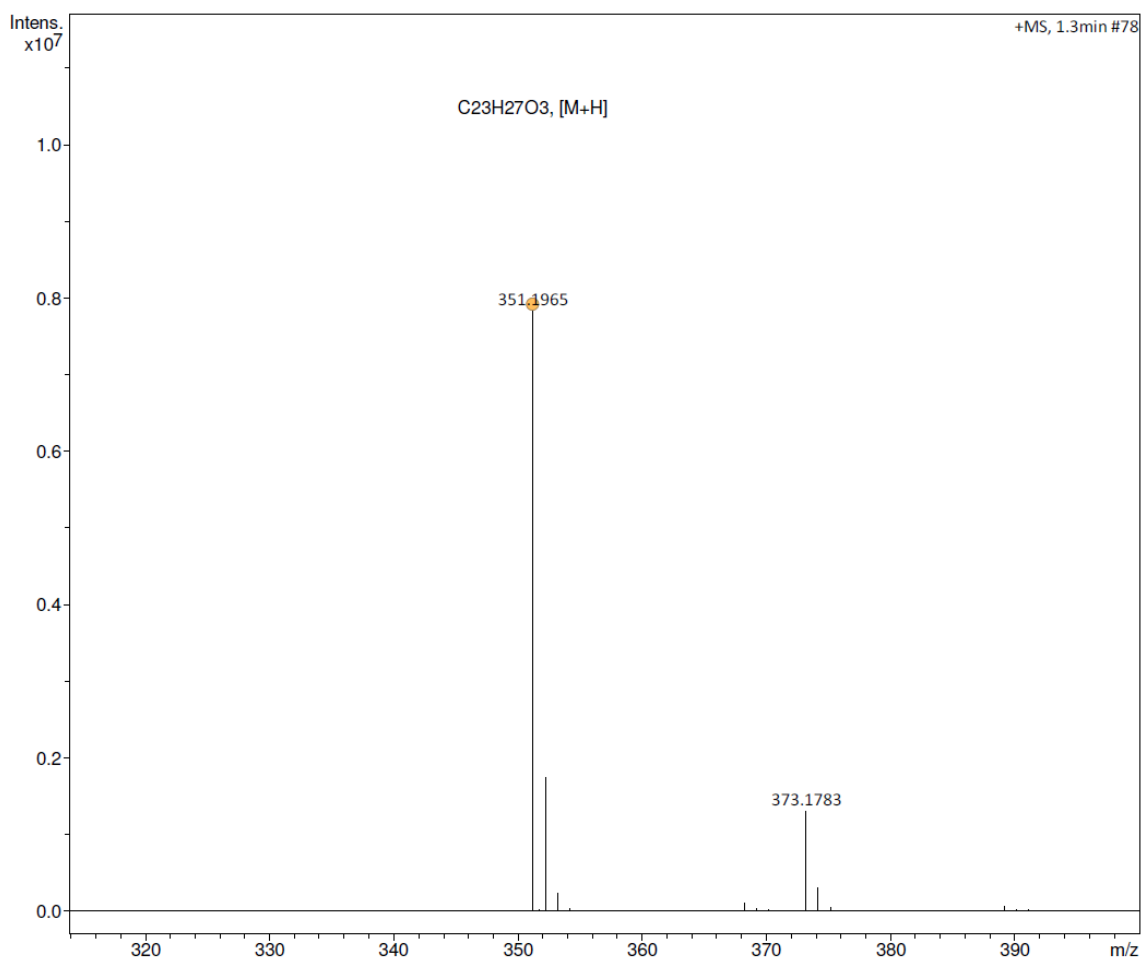

| Meas. m/z  | # | Ion Formula | Score  | m/z        | err [mDa] | err [ppm] | mSigma | rdb  | e <sup>-</sup> | Conf | N-Rule | Adduct |
|------------|---|-------------|--------|------------|-----------|-----------|--------|------|----------------|------|--------|--------|
| 351.196540 | 1 | C23H27O3    | 100.00 | 351.195471 | -1.1      | -3.0      | 18.3   | 10.5 | even           | ok   |        | M+H    |

GA7\_01\_2320.d

Bruker Compass DataAnalysis 4.2

printed: 2/15/2021 12:56:54 PM

by: CIF

Page 1 of 1

**HR-MS spectrum of XD-2**



SAMPLE INFORMATION

|                   |                         |                     |                                |
|-------------------|-------------------------|---------------------|--------------------------------|
| Sample Name:      | 2                       | Acquired By:        | System                         |
| Sample Type:      | Unknown                 | Sample Set Name:    | 09042021                       |
| Vial:             | 16                      | Acq. Method Set:    | CIF                            |
| Injection #:      | 1                       | Processing Method:  | 2                              |
| Injection Volume: | 10.00 ul                | Channel Name:       | PDA Max Plot 190.0 - 800.0     |
| Run Time:         | 10.0 Minutes            | Proc. Chnl. Descr.: | W2996 PDA MaxPlot (190.0 nm to |
| Date Acquired:    | 09-04-2021 17:27:25 IST |                     |                                |
| Date Processed:   | 09-04-2021 18:07:47 IST |                     |                                |

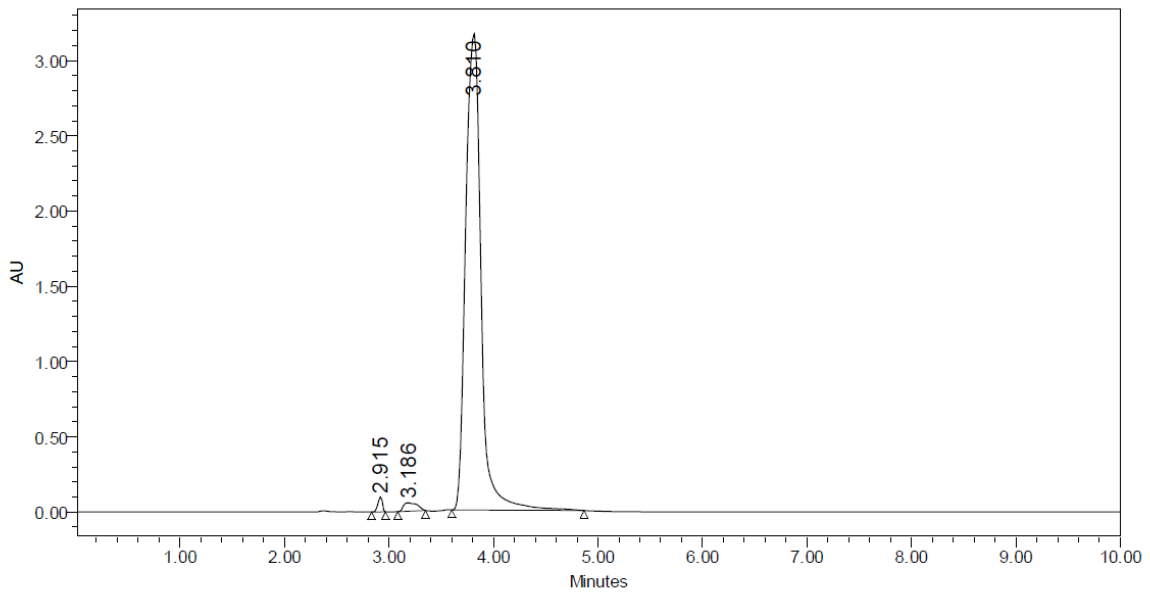

|   | RT    | Area     | % Area | Height  |
|---|-------|----------|--------|---------|
| 1 | 2.915 | 299582   | 0.90   | 97225   |
| 2 | 3.186 | 510674   | 1.54   | 55526   |
| 3 | 3.810 | 32452952 | 97.56  | 3183422 |

Reported by User: System  
 Report Method: S P PUNE UNIVERSITY  
 Report Method ID 2116  
 Page: 1 of 1

Project Name: Defaults\1.8  
 Date Printed:  
 09-04-2021  
 18:07:58 Asia/Kolkata

HPLC spectrum of XD-2

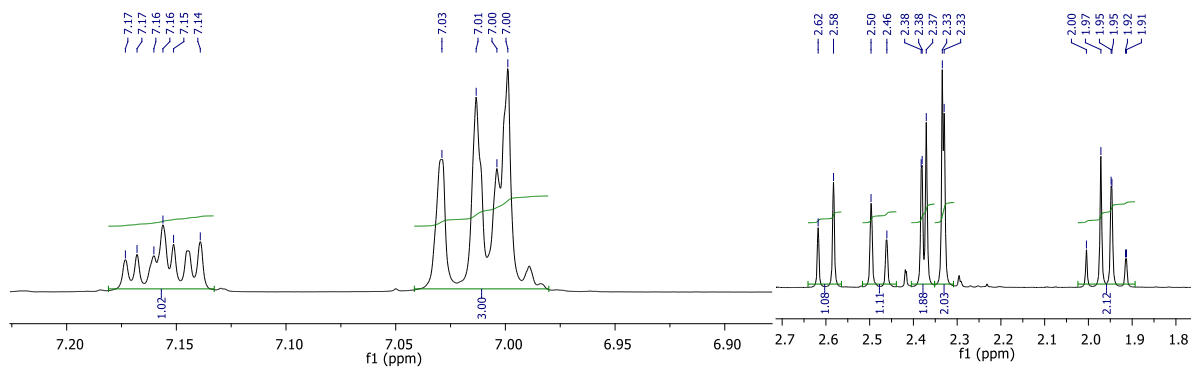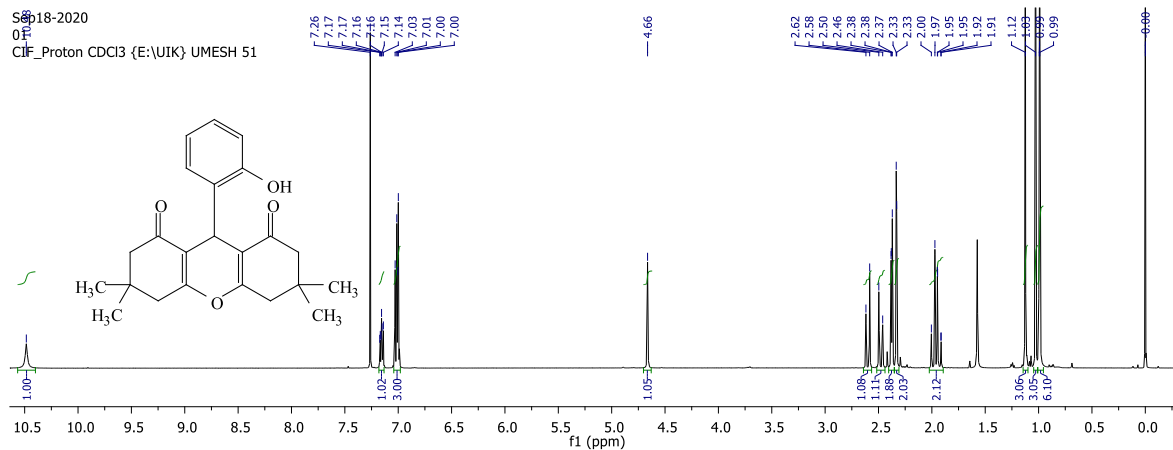

### **<sup>1</sup>H NMR (500 MHz, CDCl<sub>3</sub>) of XD-3**

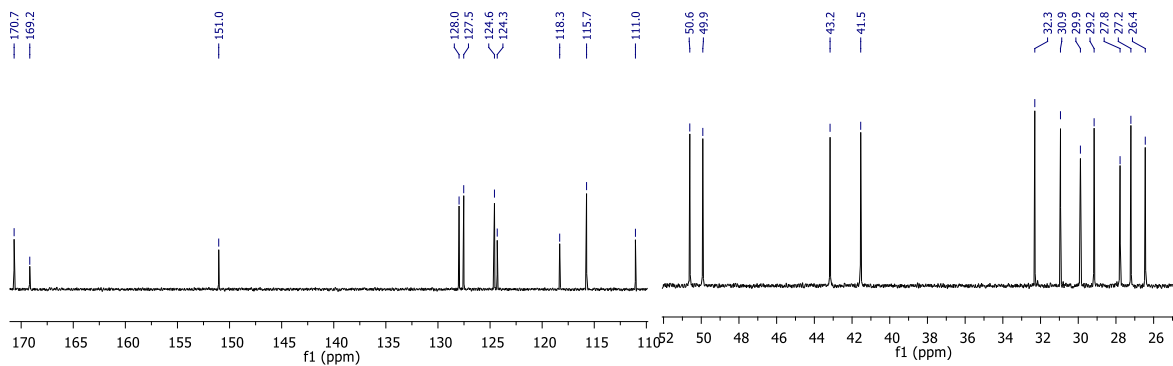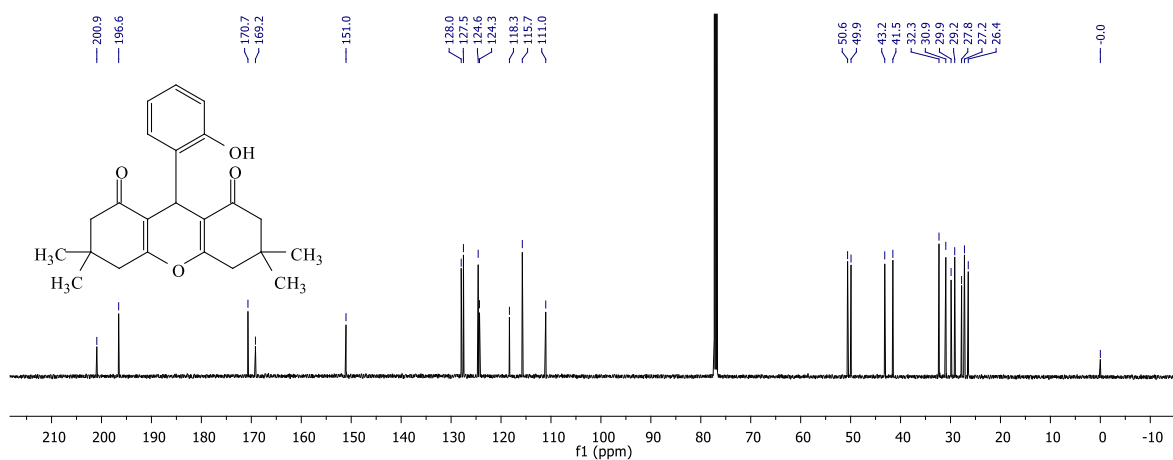

### **<sup>13</sup>C NMR (125 MHz, CDCl<sub>3</sub>) of XD-3**

**Savitribai Phule Pune University - Central Instrumentation Facility**

**Analysis Info**

|               |                                                       |                  |                     |               |
|---------------|-------------------------------------------------------|------------------|---------------------|---------------|
| Analysis Name | D:\Data\2021\SPPU\CIF\Umesh\06022021\01_GD1_01_2324.d | Acquisition Date | 2/6/2021 8:27:50 PM |               |
| Method        | dlc_ms50-800mz_10min_0.120mlflow_90b.m                | Operator         | CIF                 |               |
| Sample Name   | 01                                                    | Instrument       | impact HD           | 1819696.00184 |
| Comment       |                                                       |                  |                     |               |

**Acquisition Parameter**

|             |         |                      |          |                  |           |
|-------------|---------|----------------------|----------|------------------|-----------|
| Source Type | ESI     | Ion Polarity         | Positive | Set Nebulizer    | 1.7 Bar   |
| Focus       | Active  | Set Capillary        | 4500 V   | Set Dry Heater   | 200 °C    |
| Scan Begin  | 50 m/z  | Set End Plate Offset | -500 V   | Set Dry Gas      | 7.0 l/min |
| Scan End    | 800 m/z | Set Charging Voltage | 2000 V   | Set Divert Valve | Source    |
|             |         | Set Corona           | 0 nA     | Set APCI Heater  | 0 °C      |

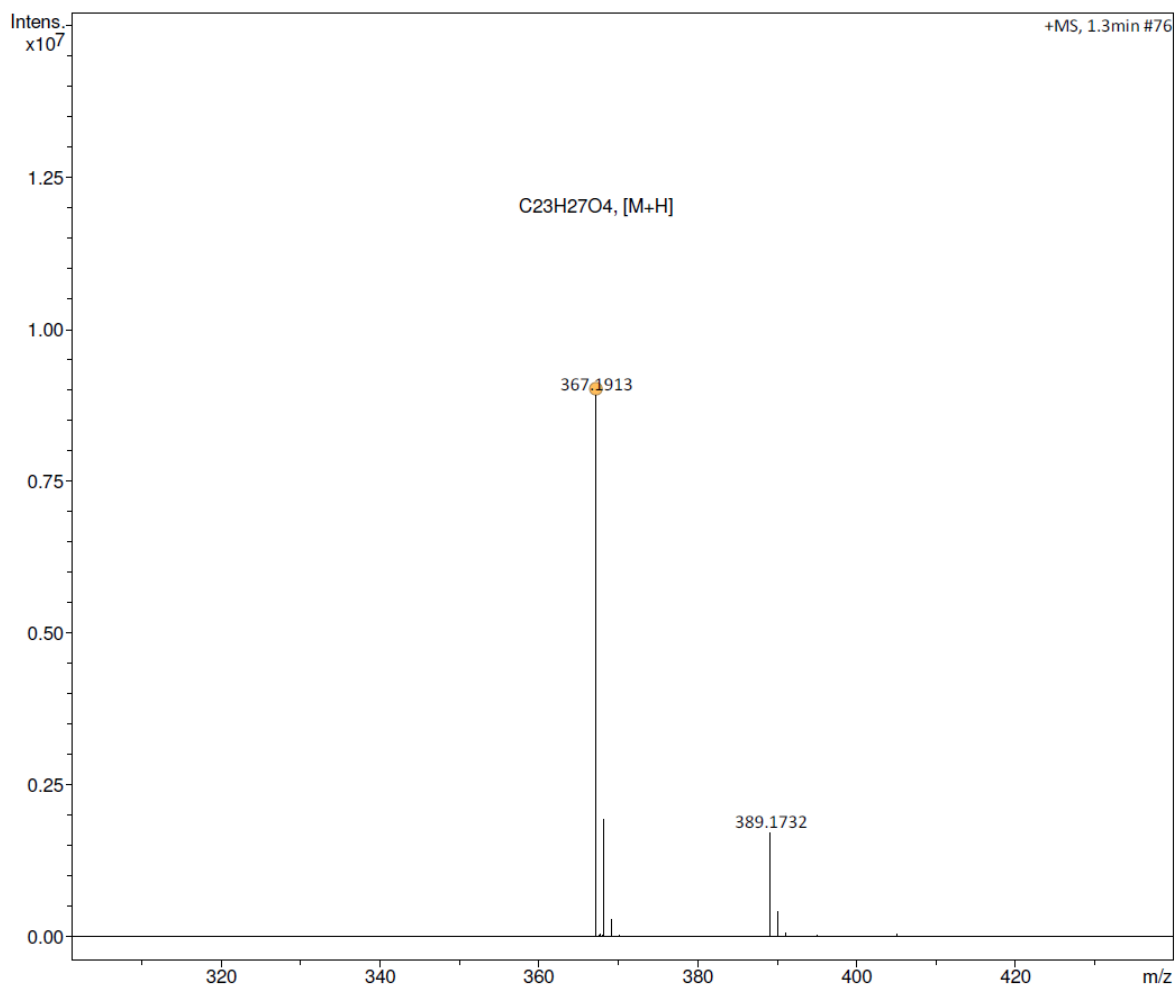

| Meas. m/z  | # | Ion Formula                                    | Score  | m/z        | err [mDa] | err [ppm] | mSigma | rdb  | e <sup>-</sup> | Conf | N-Rule | Adduct |
|------------|---|------------------------------------------------|--------|------------|-----------|-----------|--------|------|----------------|------|--------|--------|
| 367.191282 | 1 | C <sub>23</sub> H <sub>27</sub> O <sub>4</sub> | 100.00 | 367.190386 | -0.9      | -2.4      | 22.2   | 10.5 | even           |      | ok     | M+H    |

GD1\_01\_2324.d

Bruker Compass DataAnalysis 4.2

printed: 2/15/2021 12:12:05 PM

by: CIF

Page 1 of 1

**HR-MS spectrum of XD-3**

SAMPLE INFORMATION

|                   |                         |                     |                                |
|-------------------|-------------------------|---------------------|--------------------------------|
| Sample Name:      | 3                       | Acquired By:        | System                         |
| Sample Type:      | Unknown                 | Sample Set Name:    | 09042021                       |
| Vial:             | 13                      | Acq. Method Set:    | CIF                            |
| Injection #:      | 1                       | Processing Method:  | 3                              |
| Injection Volume: | 10.00 ul                | Channel Name:       | PDA Max Plot 190.0 - 800.0     |
| Run Time:         | 10.0 Minutes            | Proc. Chnl. Descr.: | W2996 PDA MaxPlot (190.0 nm to |
| Date Acquired:    | 09-04-2021 16:54:59 IST |                     |                                |
| Date Processed:   | 09-04-2021 18:04:21 IST |                     |                                |

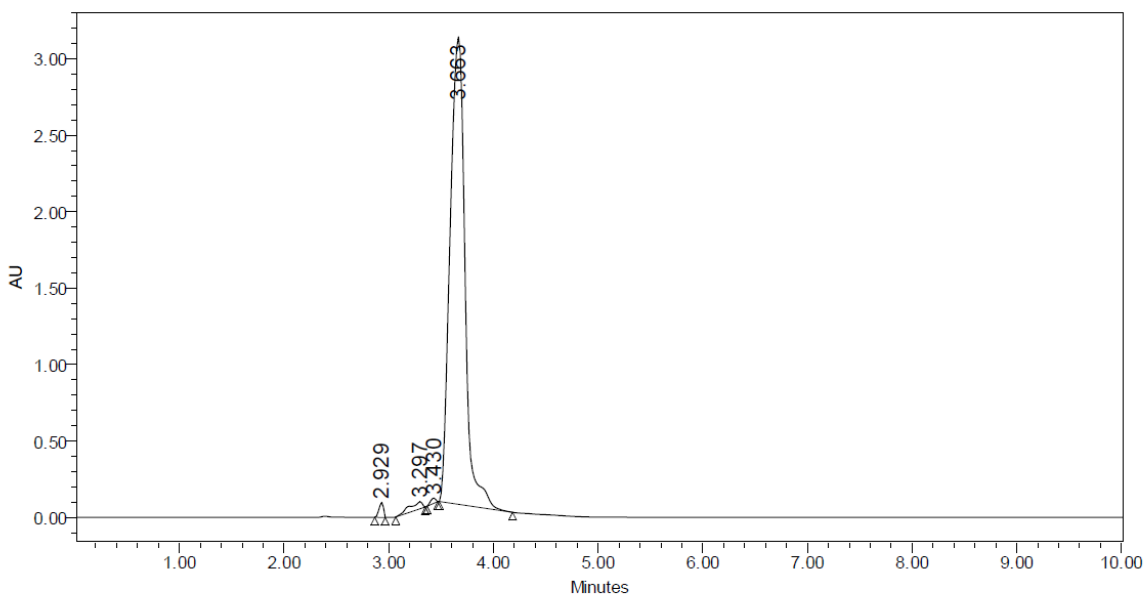

|   | RT    | Area     | % Area | Height  |
|---|-------|----------|--------|---------|
| 1 | 2.929 | 284151   | 0.92   | 94389   |
| 2 | 3.297 | 444077   | 1.44   | 46083   |
| 3 | 3.430 | 118620   | 0.38   | 32701   |
| 4 | 3.663 | 30080625 | 97.26  | 3061717 |

Reported by User: System  
 Report Method: S P PUNE UNIVERSITY  
 Report Method ID 2116  
 Page: 1 of 1

Project Name: Defaults\1.8  
 Date Printed:  
 09-04-2021  
 18:05:31 Asia/Kolkata

HPLC spectrum of XD-3

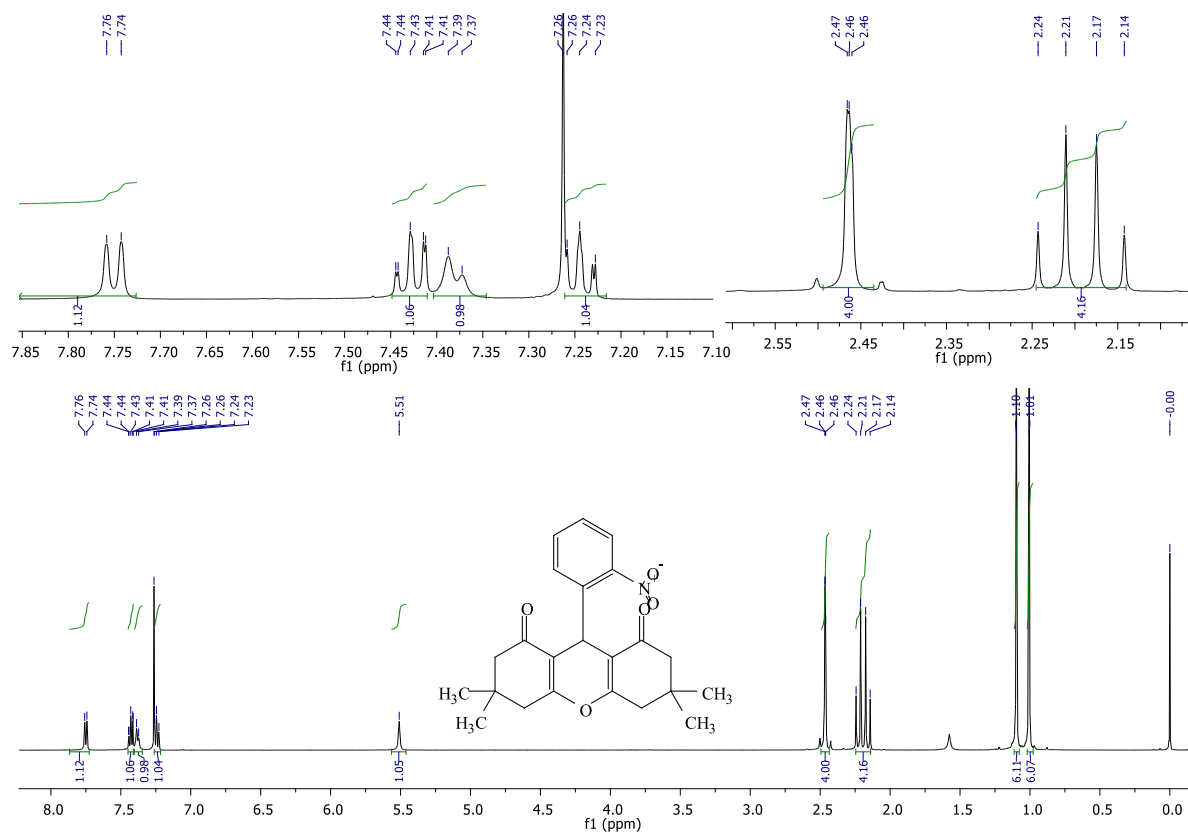

**<sup>1</sup>H NMR (500 MHz, CDCl<sub>3</sub>) of XD-4**

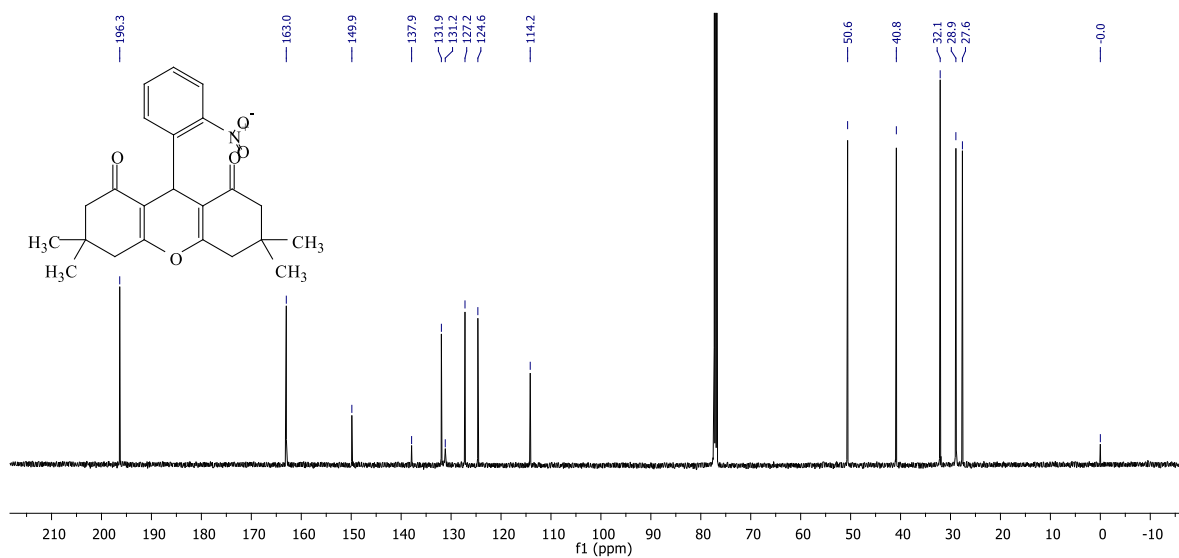

**<sup>13</sup>C NMR (125 MHz, CDCl<sub>3</sub>) of XD-4**

**Savitribai Phule Pune University - Central Instrumentation Facility**

**Analysis Info**

|               |                                                       |                  |                         |
|---------------|-------------------------------------------------------|------------------|-------------------------|
| Analysis Name | D:\Data\2021\SPPU\CIF\Umesh\06022021\07_GE1_01_2325.d | Acquisition Date | 2/8/2021 11:37:10 AM    |
| Method        | dlc_ms50-800mz_10min_0.120mlflow_90b.m                | Operator         | CIF                     |
| Sample Name   | 07                                                    | Instrument       | impact HD 1819696.00184 |
| Comment       |                                                       |                  |                         |

**Acquisition Parameter**

|             |         |                      |          |                  |           |
|-------------|---------|----------------------|----------|------------------|-----------|
| Source Type | ESI     | Ion Polarity         | Positive | Set Nebulizer    | 1.7 Bar   |
| Focus       | Active  | Set Capillary        | 4500 V   | Set Dry Heater   | 200 °C    |
| Scan Begin  | 50 m/z  | Set End Plate Offset | -500 V   | Set Dry Gas      | 7.0 l/min |
| Scan End    | 800 m/z | Set Charging Voltage | 2000 V   | Set Divert Valve | Source    |
|             |         | Set Corona           | 0 nA     | Set APCI Heater  | 0 °C      |

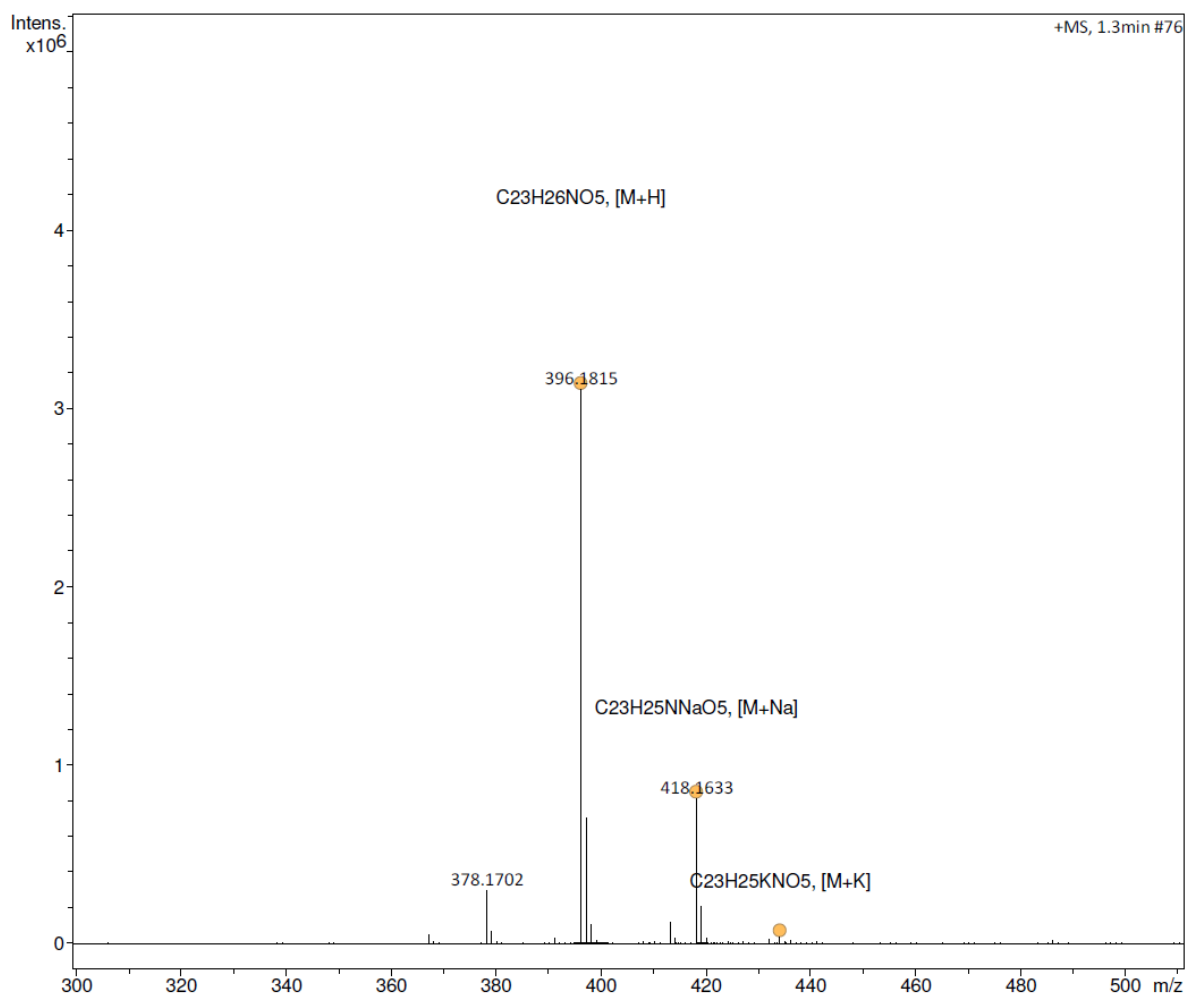

| Meas. m/z  | # | Ion Formula | Score  | m/z        | err [mDa] | err [ppm] | mSigma | rdB  | e <sup>-</sup> | Conf | N-Rule | Adduct |
|------------|---|-------------|--------|------------|-----------|-----------|--------|------|----------------|------|--------|--------|
| 396.181544 | 1 | C23H26NO5   | 100.00 | 396.180549 | -1.0      | -2.5      | 18.7   | 11.5 | even           |      | ok     | M+H    |
| 418.163276 | 1 | C23H25NNO5  | 100.00 | 418.162494 | -0.8      | -1.9      | 2.7    | 11.5 | even           |      | ok     | M+Na   |
| 434.136929 | 1 | C23H25KNO5  | 100.00 | 434.136431 | -0.5      | -1.1      | 58.5   | 11.5 | even           |      | ok     | M+K    |

GE1\_01\_2325.d

Bruker Compass DataAnalysis 4.2

printed: 2/11/2021 12:08:24 PM

by: CIF

Page 1 of 1

**HR-MS spectrum of XD-4**

SAMPLE INFORMATION

|                   |                         |                     |                                |
|-------------------|-------------------------|---------------------|--------------------------------|
| Sample Name:      | 4                       | Acquired By:        | System                         |
| Sample Type:      | Unknown                 | Sample Set Name:    | 09042021                       |
| Vial:             | 18                      | Acq. Method Set:    | CIF                            |
| Injection #:      | 1                       | Processing Method:  | 4                              |
| Injection Volume: | 10.00 ul                | Channel Name:       | PDA Max Plot 190.0 - 800.0     |
| Run Time:         | 10.0 Minutes            | Proc. Chnl. Descr.: | W2996 PDA MaxPlot (190.0 nm to |
| Date Acquired:    | 09-04-2021 13:28:08 IST |                     |                                |
| Date Processed:   | 09-04-2021 17:53:03 IST |                     |                                |

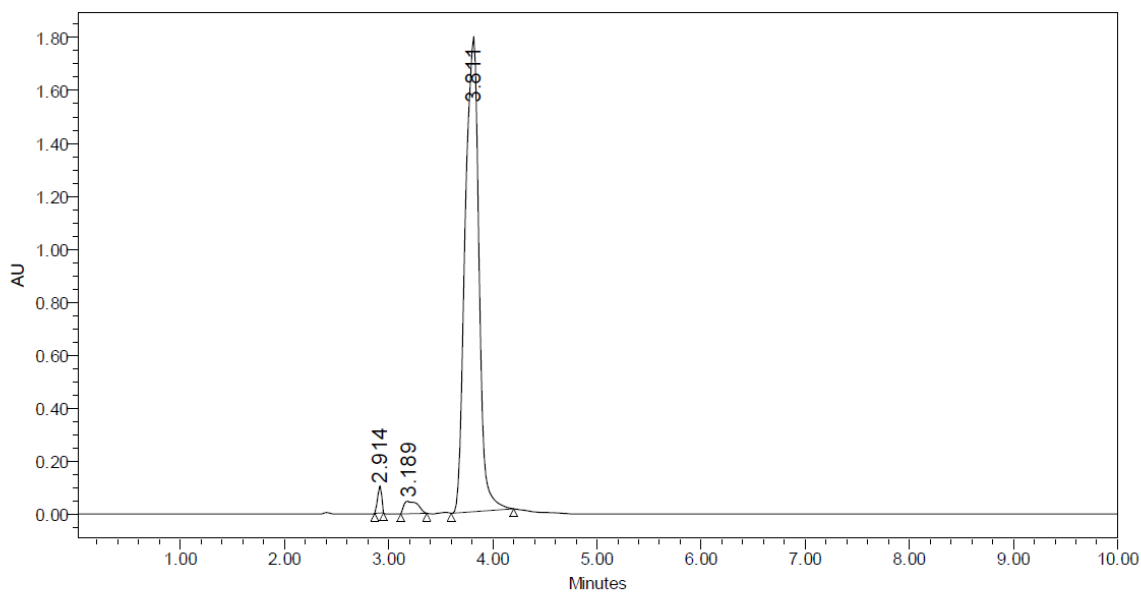

|   | RT    | Area     | % Area | Height  |
|---|-------|----------|--------|---------|
| 1 | 2.914 | 275190   | 1.60   | 96654   |
| 2 | 3.189 | 438004   | 2.55   | 47003   |
| 3 | 3.811 | 16485936 | 95.85  | 1798077 |

Reported by User: System  
 Report Method: S P PUNE UNIVERSITY  
 Report Method ID 2116  
 Page: 1 of 1

Project Name: Defaults\1.8  
 Date Printed:  
 09-04-2021  
 17:53:21 Asia/Kolkata

HPLC spectrum of XD-4

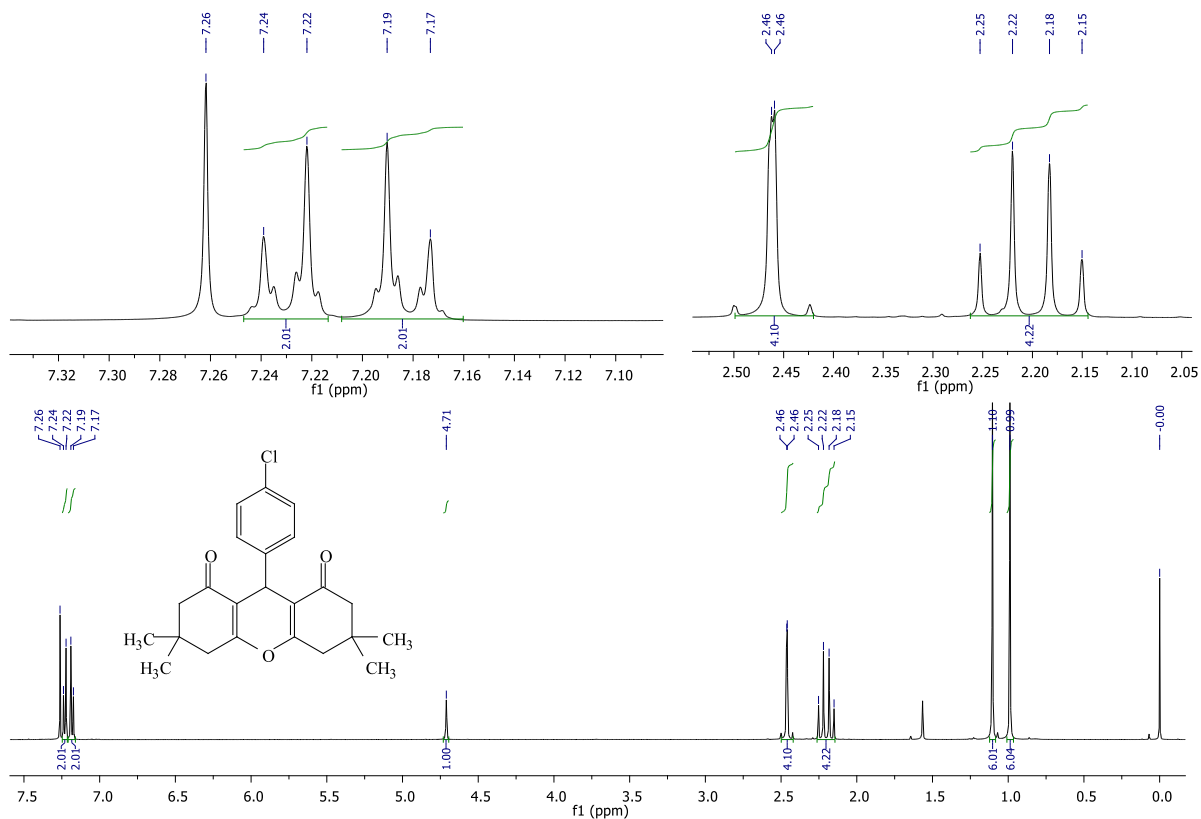

**<sup>1</sup>H NMR (500 MHz, CDCl<sub>3</sub>) of XD-5**

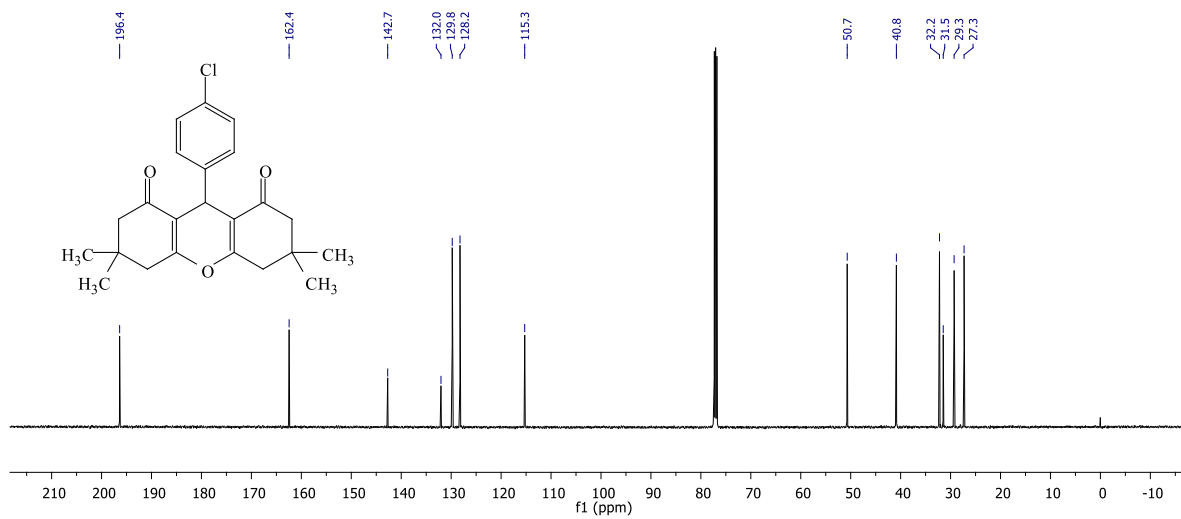

**<sup>13</sup>C NMR (125 MHz, CDCl<sub>3</sub>) of XD-5**



**Savitribai Phule Pune University - Central Instrumentation Facility**

**Analysis Info**

|               |                                                       |                  |                      |               |
|---------------|-------------------------------------------------------|------------------|----------------------|---------------|
| Analysis Name | D:\Data\2021\SPPU\CIF\Umesh\06022021\11_GB2_01_2326.d | Acquisition Date | 2/8/2021 11:47:48 AM |               |
| Method        | dlc_ms50-800mz_10min_0.120mlflow_90b.m                | Operator         | CIF                  |               |
| Sample Name   | 11                                                    | Instrument       | impact HD            | 1819696.00184 |
| Comment       |                                                       |                  |                      |               |

**Acquisition Parameter**

|             |         |                      |          |                  |           |
|-------------|---------|----------------------|----------|------------------|-----------|
| Source Type | ESI     | Ion Polarity         | Positive | Set Nebulizer    | 1.7 Bar   |
| Focus       | Active  | Set Capillary        | 4500 V   | Set Dry Heater   | 200 °C    |
| Scan Begin  | 50 m/z  | Set End Plate Offset | -500 V   | Set Dry Gas      | 7.0 l/min |
| Scan End    | 800 m/z | Set Charging Voltage | 2000 V   | Set Divert Valve | Source    |
|             |         | Set Corona           | 0 nA     | Set APCI Heater  | 0 °C      |

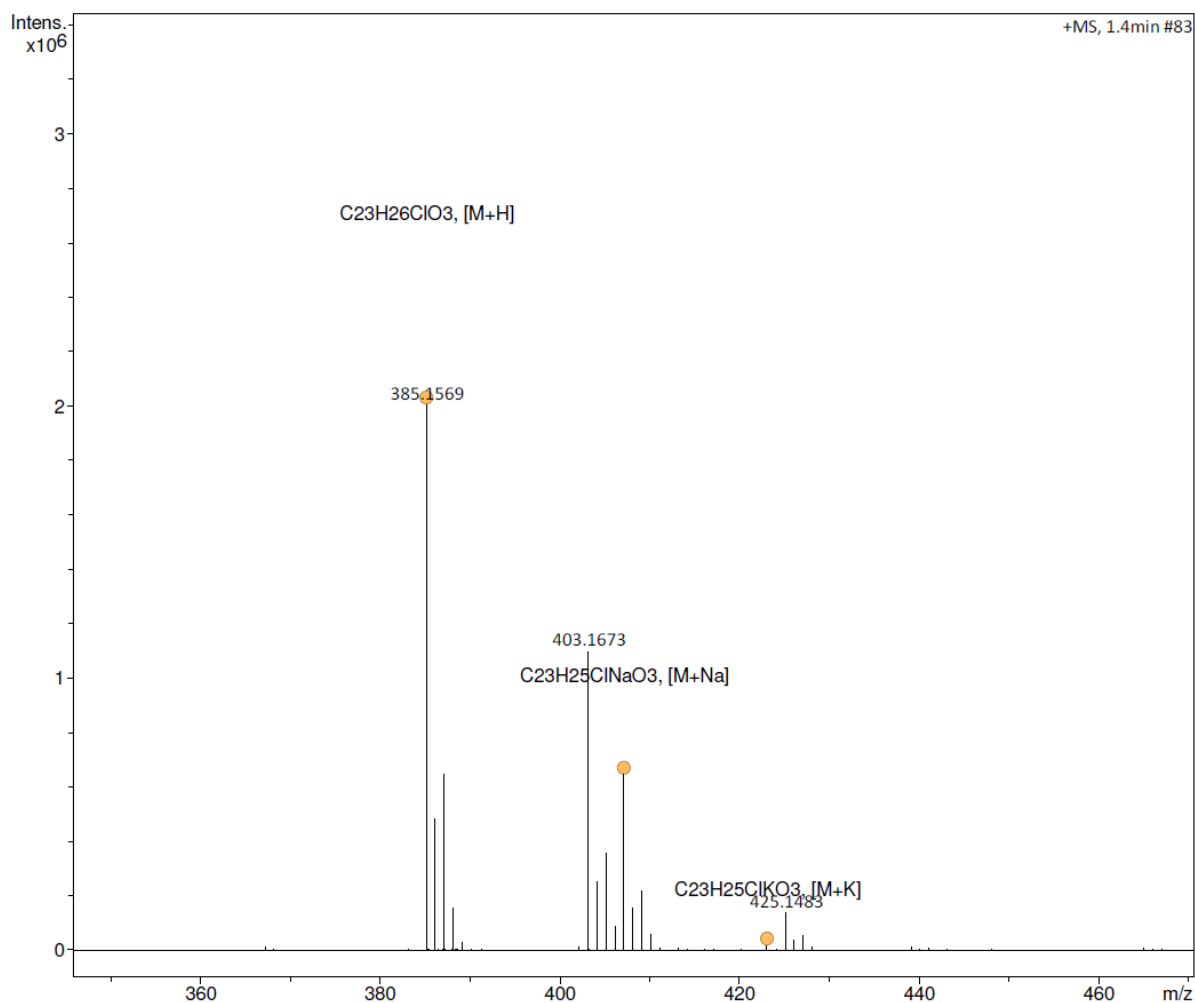

| Meas. m/z  | # | Ion Formula                                        | Score  | m/z        | err [mDa] | err [ppm] | mSigma | rdb  | e <sup>-</sup> | Conf | N-Rule | Adduct |
|------------|---|----------------------------------------------------|--------|------------|-----------|-----------|--------|------|----------------|------|--------|--------|
| 385.156857 | 1 | C <sub>23</sub> H <sub>26</sub> ClO <sub>3</sub>   | 100.00 | 385.156499 | -0.4      | -0.9      | 16.2   | 10.5 | even           |      | ok     | M+H    |
| 407.138539 | 1 | C <sub>23</sub> H <sub>25</sub> ClNaO <sub>3</sub> | 100.00 | 407.138443 | -0.1      | -0.2      | 10.1   | 10.5 | even           |      | ok     | M+Na   |
| 423.112565 | 1 | C <sub>23</sub> H <sub>25</sub> ClKO <sub>3</sub>  | 100.00 | 423.112380 | -0.2      | -0.4      | 199.0  | 10.5 | even           |      | ok     | M+K    |

GB2\_01\_2326.d

Bruker Compass DataAnalysis 4.2

printed: 2/15/2021 1:22:35 PM

by: CIF

Page 1 of 1

**HR-MS spectrum of XD-5**

SAMPLE INFORMATION

|                                         |              |                     |                                |
|-----------------------------------------|--------------|---------------------|--------------------------------|
| Sample Name:                            | 5            | Acquired By:        | System                         |
| Sample Type:                            | Unknown      | Sample Set Name:    | 09042021                       |
| Vial:                                   | 19           | Acq. Method Set:    | CIF                            |
| Injection #:                            | 1            | Processing Method:  | 5                              |
| Injection Volume:                       | 10.00 ul     | Channel Name:       | PDA Max Plot 190.0 - 800.0     |
| Run Time:                               | 10.0 Minutes | Proc. Chnl. Descr.: | W2996 PDA MaxPlot (190.0 nm to |
| Date Acquired: 09-04-2021 14:10:40 IST  |              |                     |                                |
| Date Processed: 09-04-2021 17:56:20 IST |              |                     |                                |

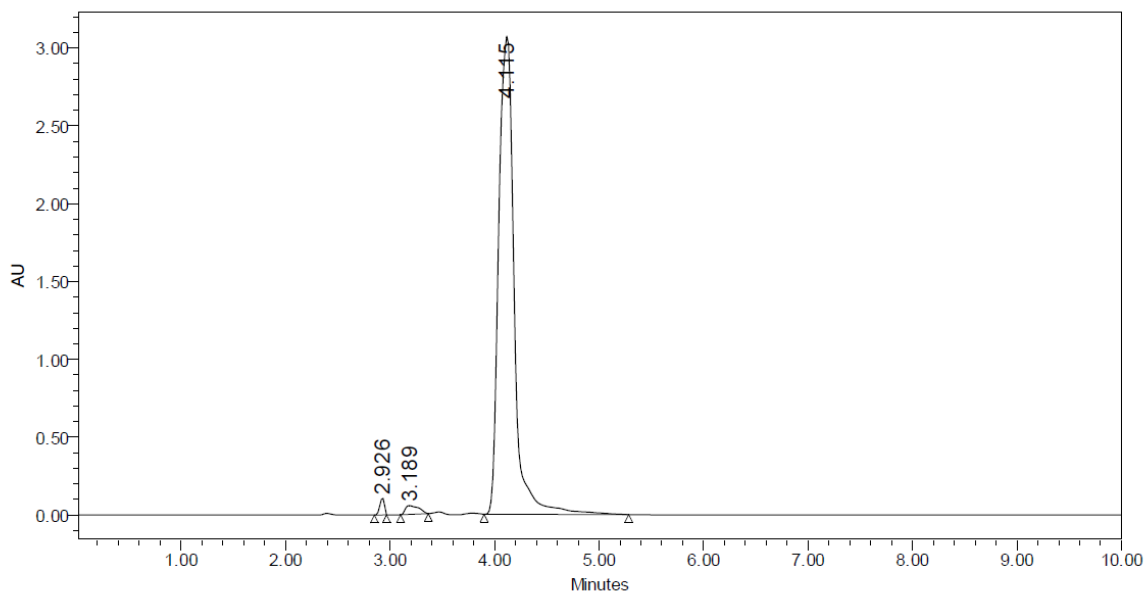

|   | RT    | Area     | % Area | Height  |
|---|-------|----------|--------|---------|
| 1 | 2.926 | 334328   | 1.03   | 102945  |
| 2 | 3.189 | 505331   | 1.56   | 57002   |
| 3 | 4.115 | 31622817 | 97.41  | 3074388 |

HPLC spectrum of XD-5

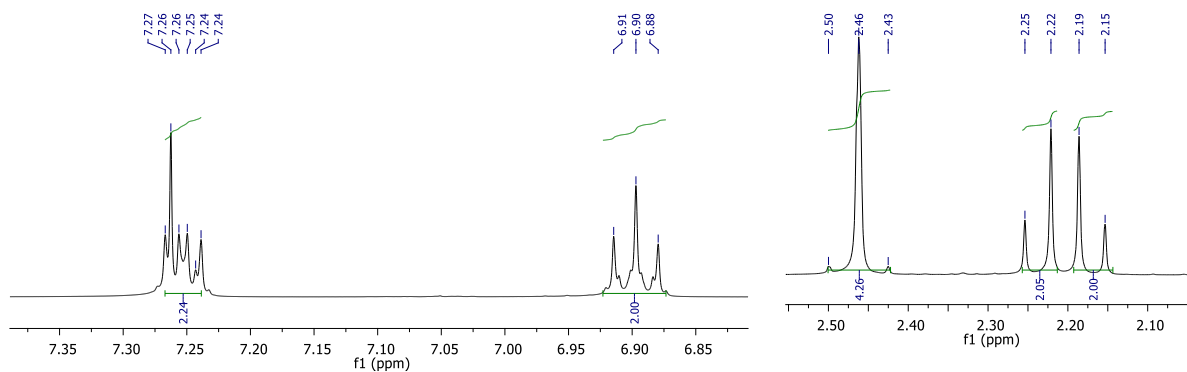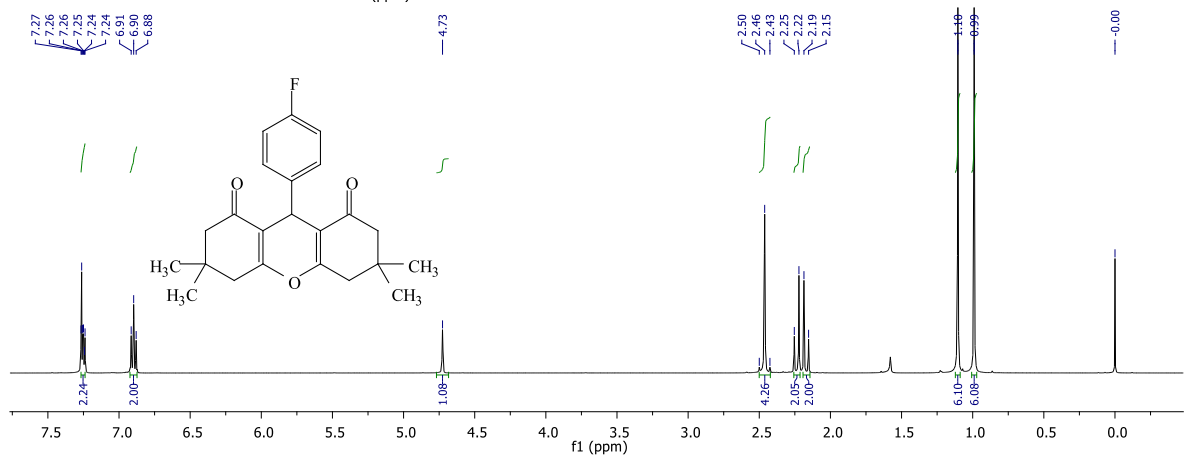

**<sup>1</sup>H NMR (500 MHz, CDCl<sub>3</sub>) of XD-6**

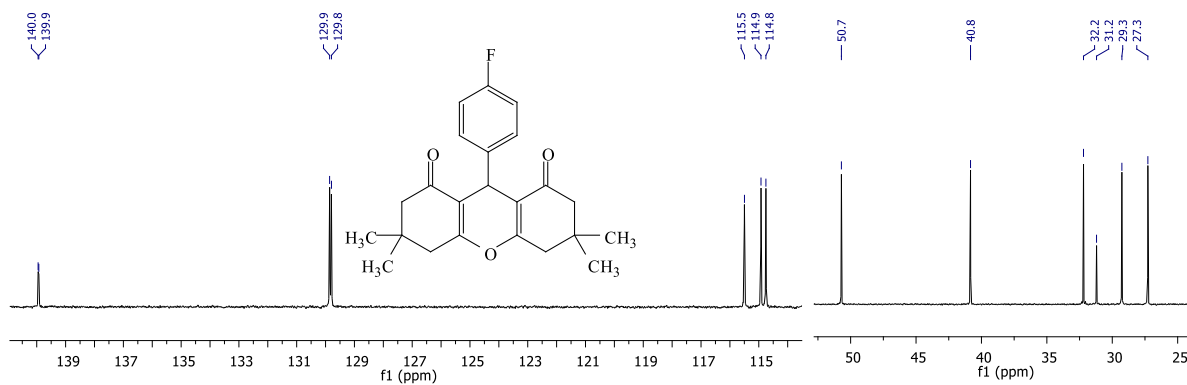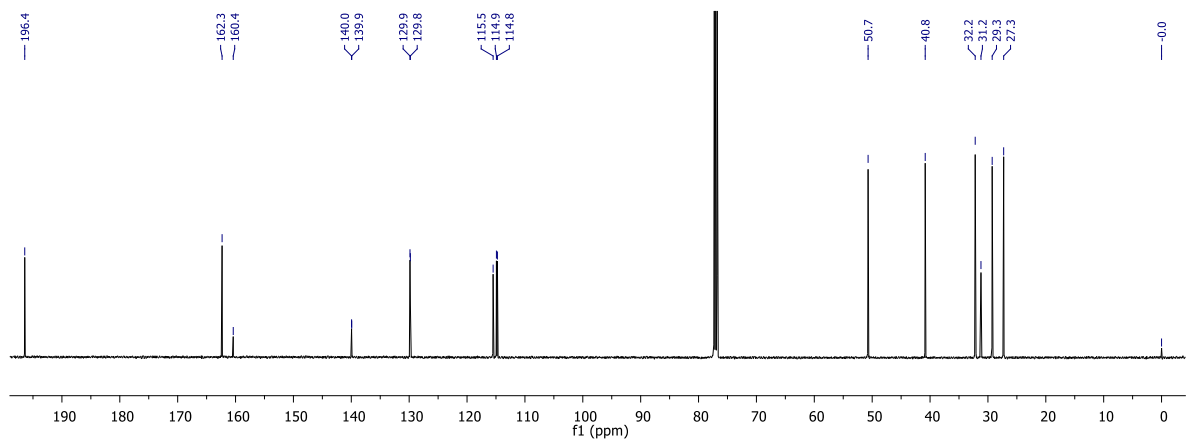

**<sup>13</sup>C NMR (125 MHz, CDCl<sub>3</sub>) of XD-6**

**Savitribai Phule Pune University - Central Instrumentation Facility**

**Analysis Info**

|               |                                                       |                  |                     |               |
|---------------|-------------------------------------------------------|------------------|---------------------|---------------|
| Analysis Name | D:\Data\2021\SPPU\CIF\Umesh\06022021\02_GA5_01_2318.d | Acquisition Date | 2/6/2021 7:21:45 PM |               |
| Method        | dlc_ms50-800mz_10min_0.120mlflow_90b.m                | Operator         | CIF                 |               |
| Sample Name   | 02                                                    | Instrument       | impact HD           | 1819696.00184 |
| Comment       |                                                       |                  |                     |               |

**Acquisition Parameter**

|             |         |                      |          |                  |           |
|-------------|---------|----------------------|----------|------------------|-----------|
| Source Type | ESI     | Ion Polarity         | Positive | Set Nebulizer    | 1.7 Bar   |
| Focus       | Active  | Set Capillary        | 4500 V   | Set Dry Heater   | 200 °C    |
| Scan Begin  | 50 m/z  | Set End Plate Offset | -500 V   | Set Dry Gas      | 7.0 l/min |
| Scan End    | 800 m/z | Set Charging Voltage | 2000 V   | Set Divert Valve | Source    |
|             |         | Set Corona           | 0 nA     | Set APCI Heater  | 0 °C      |

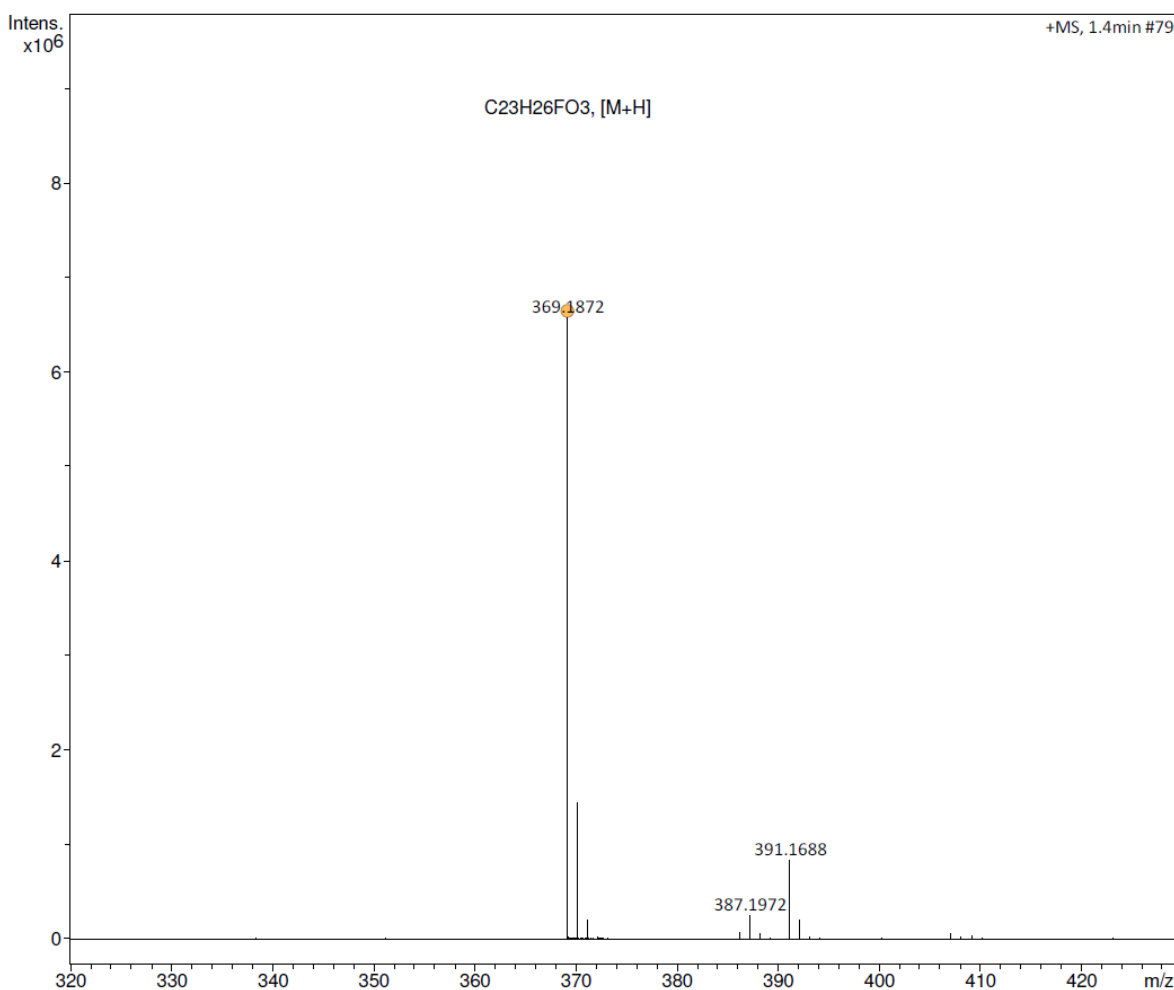

| Meas. m/z  | # | Ion Formula                                     | Score  | m/z        | err [mDa] | err [ppm] | mSigma | rdb  | e <sup>-</sup> | Conf | N-Rule | Adduct |
|------------|---|-------------------------------------------------|--------|------------|-----------|-----------|--------|------|----------------|------|--------|--------|
| 369.187167 | 1 | C <sub>23</sub> H <sub>26</sub> FO <sub>3</sub> | 100.00 | 369.186049 | -1.1      | -3.0      | 19.4   | 10.5 | even           |      | ok     | M+H    |

GA5\_01\_2318.d

Bruker Compass DataAnalysis 4.2

printed: 2/15/2021 12:35:45 PM

by: CIF

Page 1 of 1

**HR-MS spectrum of XD-6**

SAMPLE INFORMATION

|                   |                         |                     |                                |
|-------------------|-------------------------|---------------------|--------------------------------|
| Sample Name:      | 6                       | Acquired By:        | System                         |
| Sample Type:      | Unknown                 | Sample Set Name:    | 09042021                       |
| Vial:             | 12                      | Acq. Method Set:    | CIF                            |
| Injection #:      | 1                       | Processing Method:  | 6                              |
| Injection Volume: | 10.00 ul                | Channel Name:       | PDA Max Plot 190.0 - 800.0     |
| Run Time:         | 10.0 Minutes            | Proc. Chnl. Descr.: | W2996 PDA MaxPlot (190.0 nm to |
| Date Acquired:    | 09-04-2021 16:44:08 IST |                     |                                |
| Date Processed:   | 09-04-2021 18:02:14 IST |                     |                                |

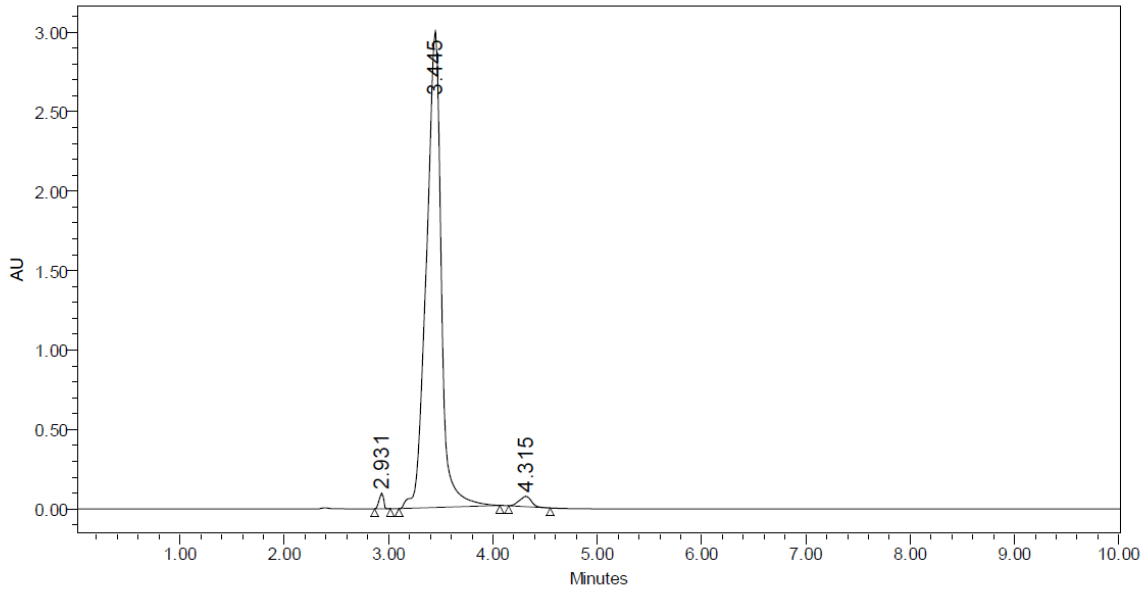

|   | RT    | Area     | % Area | Height  |
|---|-------|----------|--------|---------|
| 1 | 2.931 | 287955   | 0.95   | 95162   |
| 2 | 3.445 | 29649657 | 97.36  | 3003834 |
| 3 | 4.315 | 517376   | 1.70   | 64591   |

Reported by User: System  
 Report Method: S P PUNE UNIVERSITY  
 Report Method ID 2116  
 Page: 1 of 1

Project Name: Defaults\1.8  
 Date Printed:  
 09-04-2021  
 18:02:29 Asia/Kolkata

HPLC spectrum of XD-6

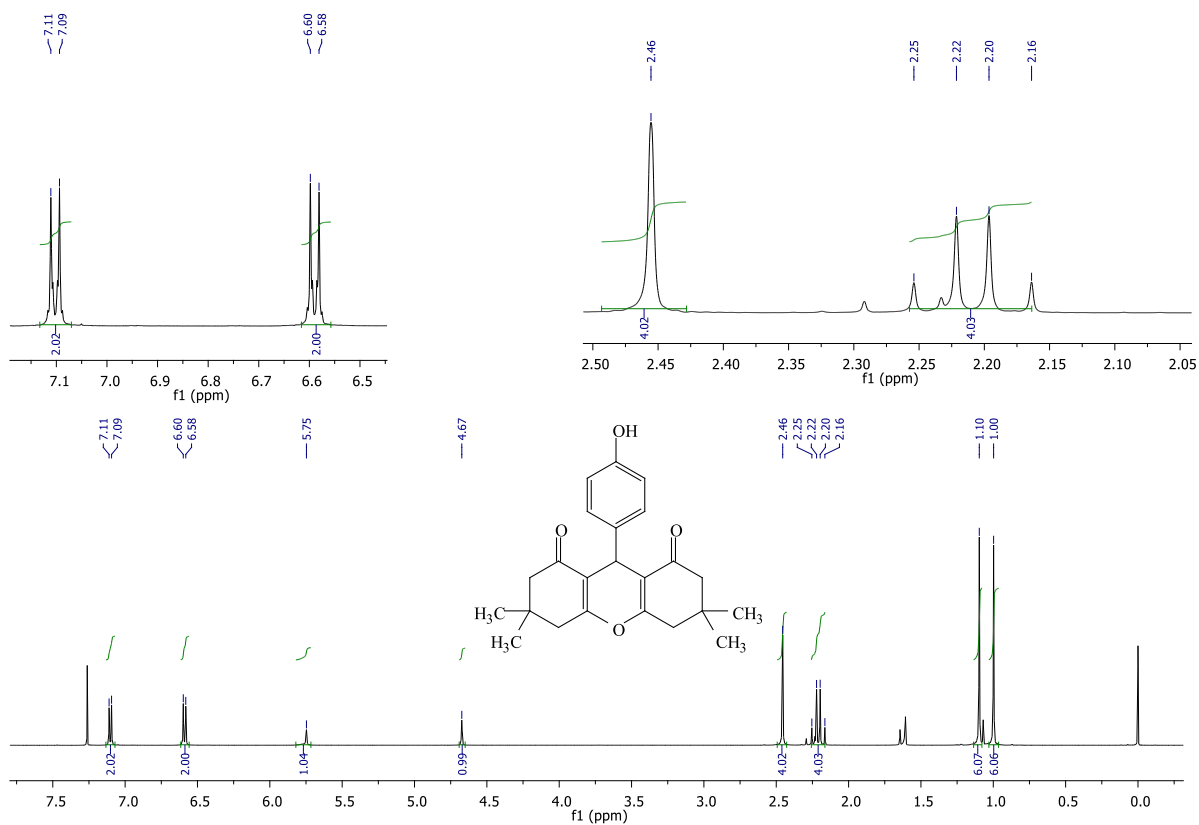

**<sup>1</sup>H NMR (500 MHz, CDCl<sub>3</sub>) of XD-7**

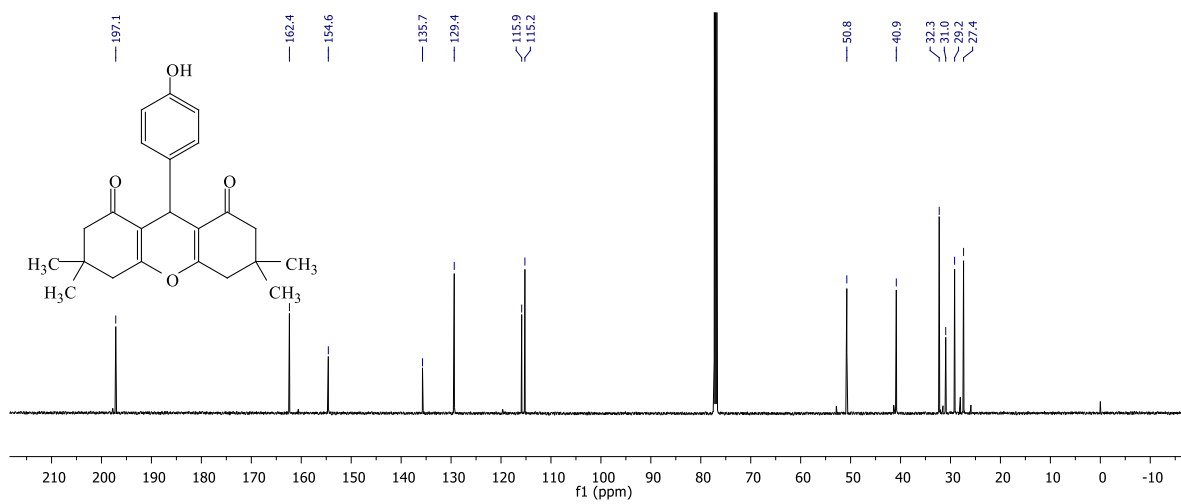

**<sup>13</sup>C NMR (125 MHz, CDCl<sub>3</sub>) of XD-7**

**Savitribai Phule Pune University - Central Instrumentation Facility**

**Analysis Info**

|               |                                                       |                  |                     |
|---------------|-------------------------------------------------------|------------------|---------------------|
| Analysis Name | D:\Data\2021\SPPU\CIF\Umesh\06022021\01_GD1_01_2324.d | Acquisition Date | 2/6/2021 8:27:50 PM |
| Method        | dlc_ms50-800mz_10min_0.120mlflow_90b.m                | Operator         | CIF                 |
| Sample Name   | 01                                                    | Instrument       | impact HD           |
| Comment       |                                                       |                  | 1819696.00184       |

**Acquisition Parameter**

|             |         |                      |          |                  |           |
|-------------|---------|----------------------|----------|------------------|-----------|
| Source Type | ESI     | Ion Polarity         | Positive | Set Nebulizer    | 1.7 Bar   |
| Focus       | Active  | Set Capillary        | 4500 V   | Set Dry Heater   | 200 °C    |
| Scan Begin  | 50 m/z  | Set End Plate Offset | -500 V   | Set Dry Gas      | 7.0 l/min |
| Scan End    | 800 m/z | Set Charging Voltage | 2000 V   | Set Divert Valve | Source    |
|             |         | Set Corona           | 0 nA     | Set APCI Heater  | 0 °C      |

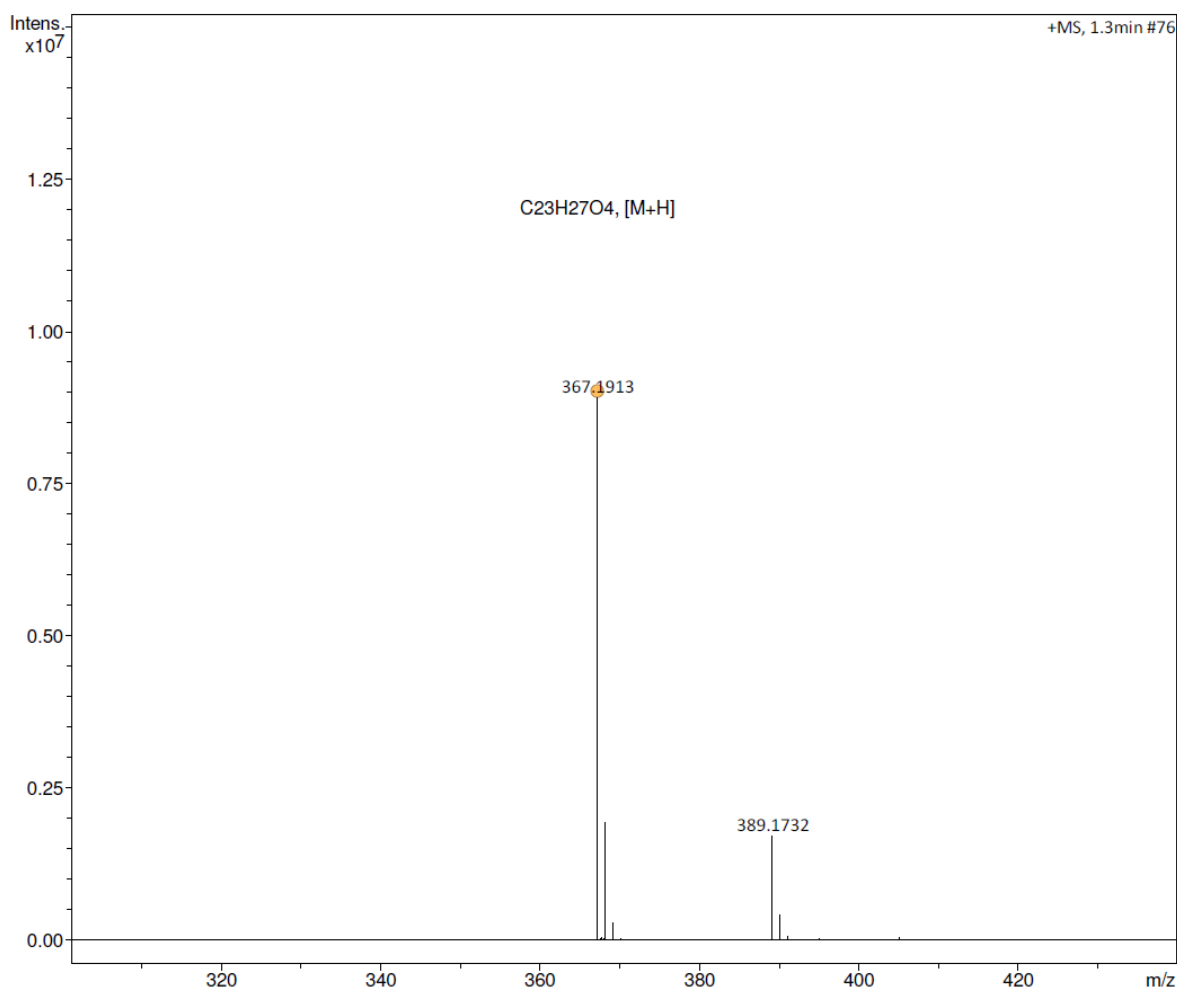

| Meas. m/z  | # | Ion Formula | Score  | m/z        | err [mDa] | err [ppm] | mSigma | rdb  | e <sup>-</sup> | Conf | N-Rule | Adduct |
|------------|---|-------------|--------|------------|-----------|-----------|--------|------|----------------|------|--------|--------|
| 367.191282 | 1 | C23H27O4    | 100.00 | 367.190386 | -0.9      | -2.4      | 22.2   | 10.5 | even           |      | ok     | M+H    |

GD1\_01\_2324.d

Bruker Compass DataAnalysis 4.2

printed: 2/15/2021 12:12:05 PM

by: CIF

Page 1 of 1

**HR-MS spectrum of XD-7**

SAMPLE INFORMATION

|                   |                         |                     |                                |
|-------------------|-------------------------|---------------------|--------------------------------|
| Sample Name:      | 7                       | Acquired By:        | System                         |
| Sample Type:      | Unknown                 | Sample Set Name:    | 09042021                       |
| Vial:             | 17                      | Acq. Method Set:    | CIF                            |
| Injection #:      | 1                       | Processing Method:  | 7                              |
| Injection Volume: | 10.00 ul                | Channel Name:       | PDA Max Plot 190.0 - 800.0     |
| Run Time:         | 10.0 Minutes            | Proc. Chnl. Descr.: | W2996 PDA MaxPlot (190.0 nm to |
| Date Acquired:    | 09-04-2021 17:51:33 IST |                     |                                |
| Date Processed:   | 09-04-2021 18:11:44 IST |                     |                                |

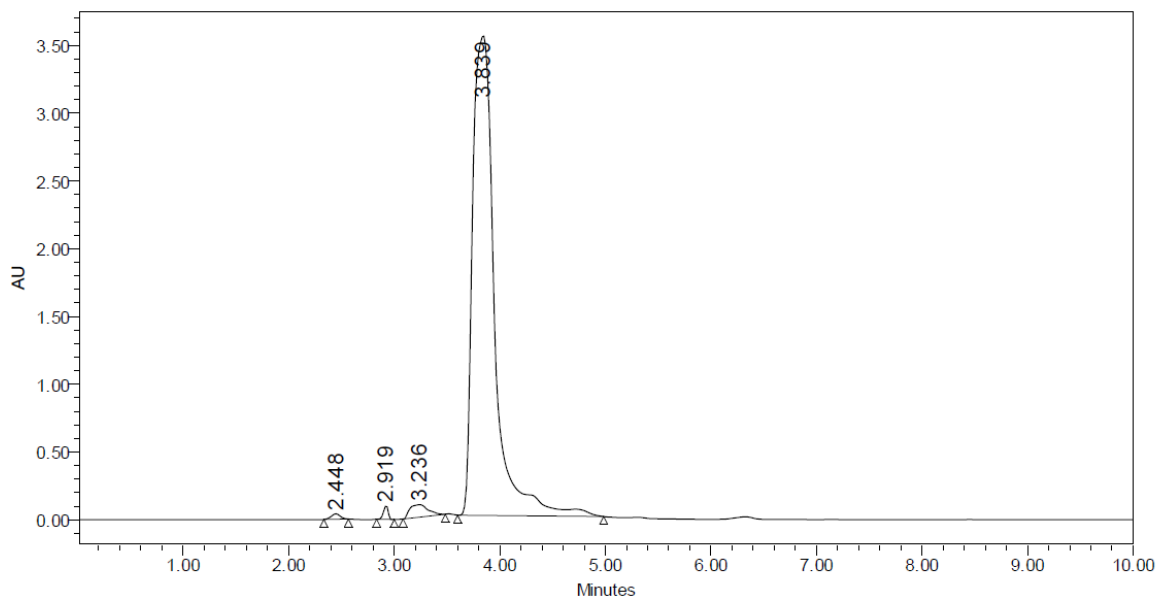

|   | RT    | Area     | % Area | Height  |
|---|-------|----------|--------|---------|
| 1 | 2.448 | 236370   | 0.44   | 39914   |
| 2 | 2.919 | 311373   | 0.59   | 95482   |
| 3 | 3.236 | 1117550  | 2.10   | 92193   |
| 4 | 3.839 | 51456214 | 96.87  | 3553339 |

Reported by User: System  
 Report Method: S P PUNE UNIVERSITY  
 Report Method ID2116  
 Page: 1 of 1

Project Name: Defaults\1.8  
 Date Printed:  
 09-04-2021  
 18:11:56 Asia/Kolkata

HPLC spectrum of XD-7



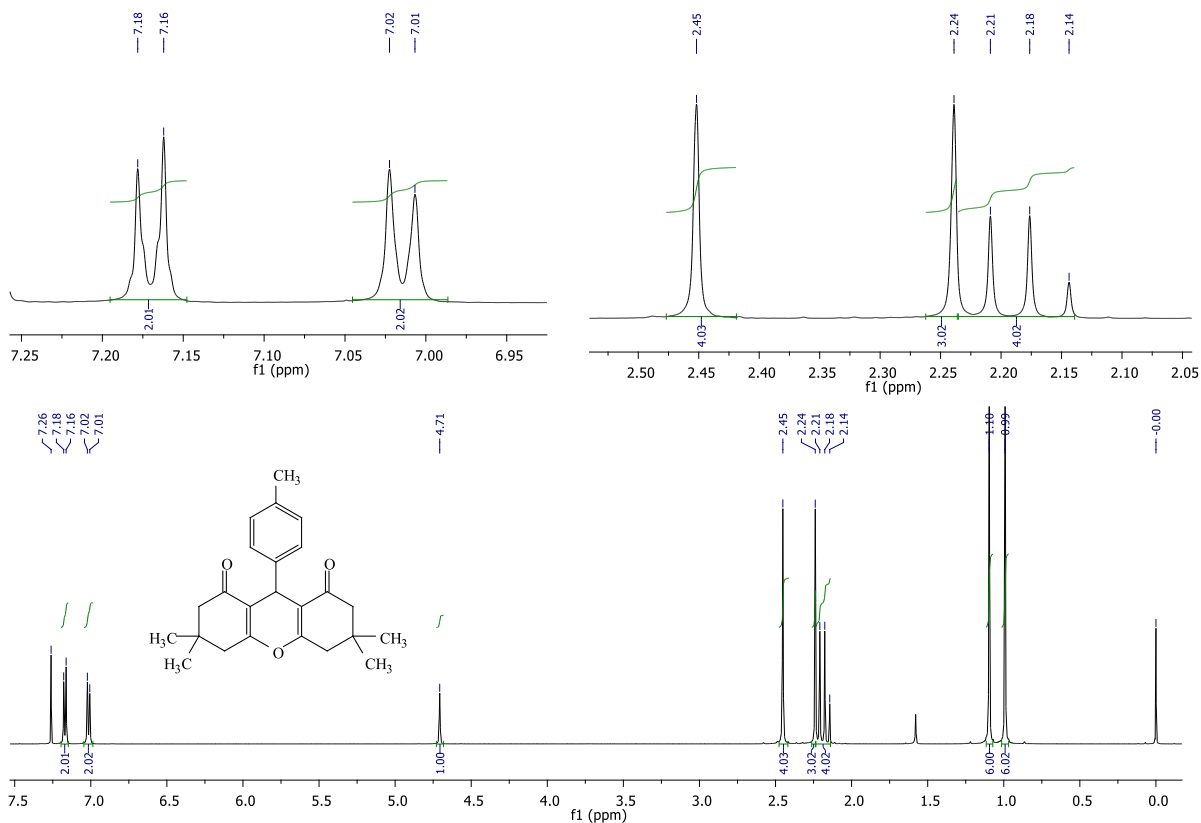

**<sup>1</sup>H NMR (500 MHz, CDCl<sub>3</sub>) of XD-8**

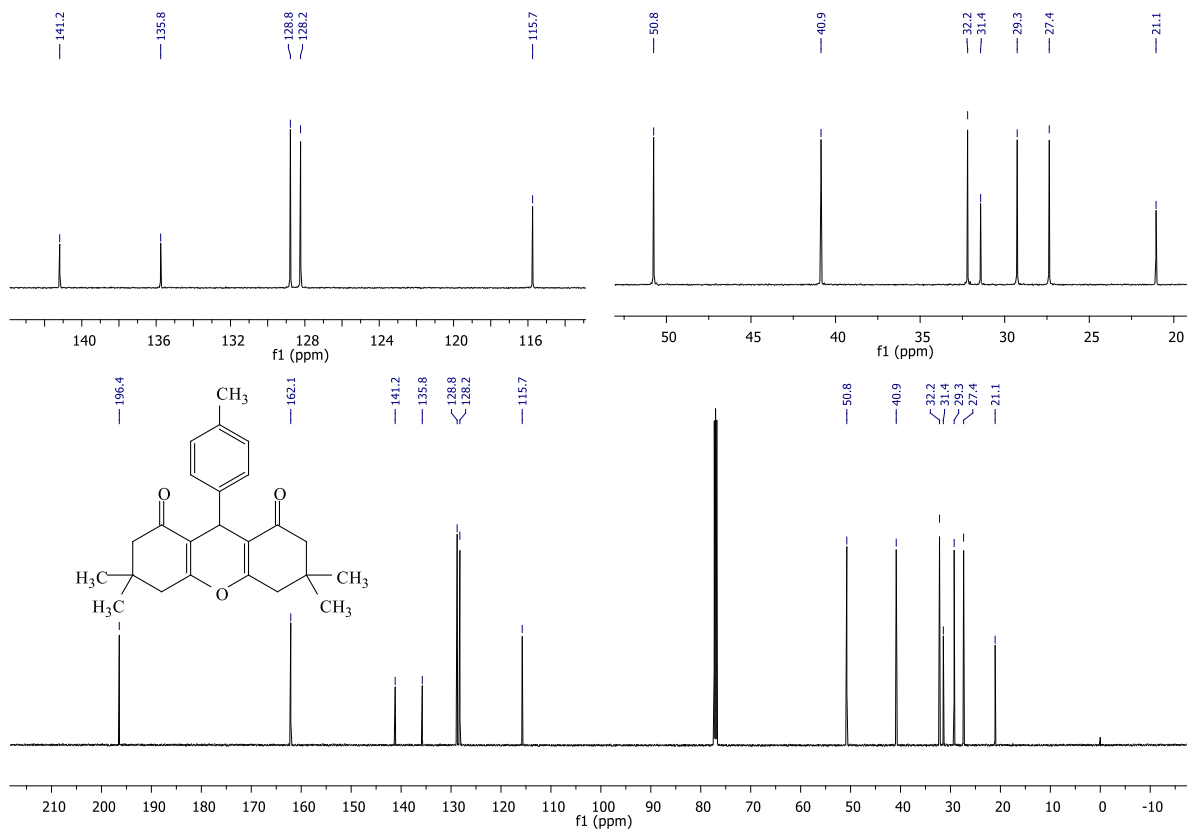

**<sup>13</sup>C NMR (125 MHz, CDCl<sub>3</sub>) of XD-8**

**Savitribai Phule Pune University - Central Instrumentation Facility**

**Analysis Info**

|               |                                                       |                  |                         |
|---------------|-------------------------------------------------------|------------------|-------------------------|
| Analysis Name | D:\Data\2021\SPPU\CIF\Umesh\06022021\03_GA4_01_2317.d | Acquisition Date | 2/6/2021 7:11:05 PM     |
| Method        | dlc_ms50-800mz_10min_0.120mlflow_90b.m                | Operator         | CIF                     |
| Sample Name   | 03                                                    | Instrument       | impact HD 1819696.00184 |
| Comment       |                                                       |                  |                         |

**Acquisition Parameter**

|             |         |                      |          |                  |           |
|-------------|---------|----------------------|----------|------------------|-----------|
| Source Type | ESI     | Ion Polarity         | Positive | Set Nebulizer    | 1.7 Bar   |
| Focus       | Active  | Set Capillary        | 4500 V   | Set Dry Heater   | 200 °C    |
| Scan Begin  | 50 m/z  | Set End Plate Offset | -500 V   | Set Dry Gas      | 7.0 l/min |
| Scan End    | 800 m/z | Set Charging Voltage | 2000 V   | Set Divert Valve | Source    |
|             |         | Set Corona           | 0 nA     | Set APCI Heater  | 0 °C      |

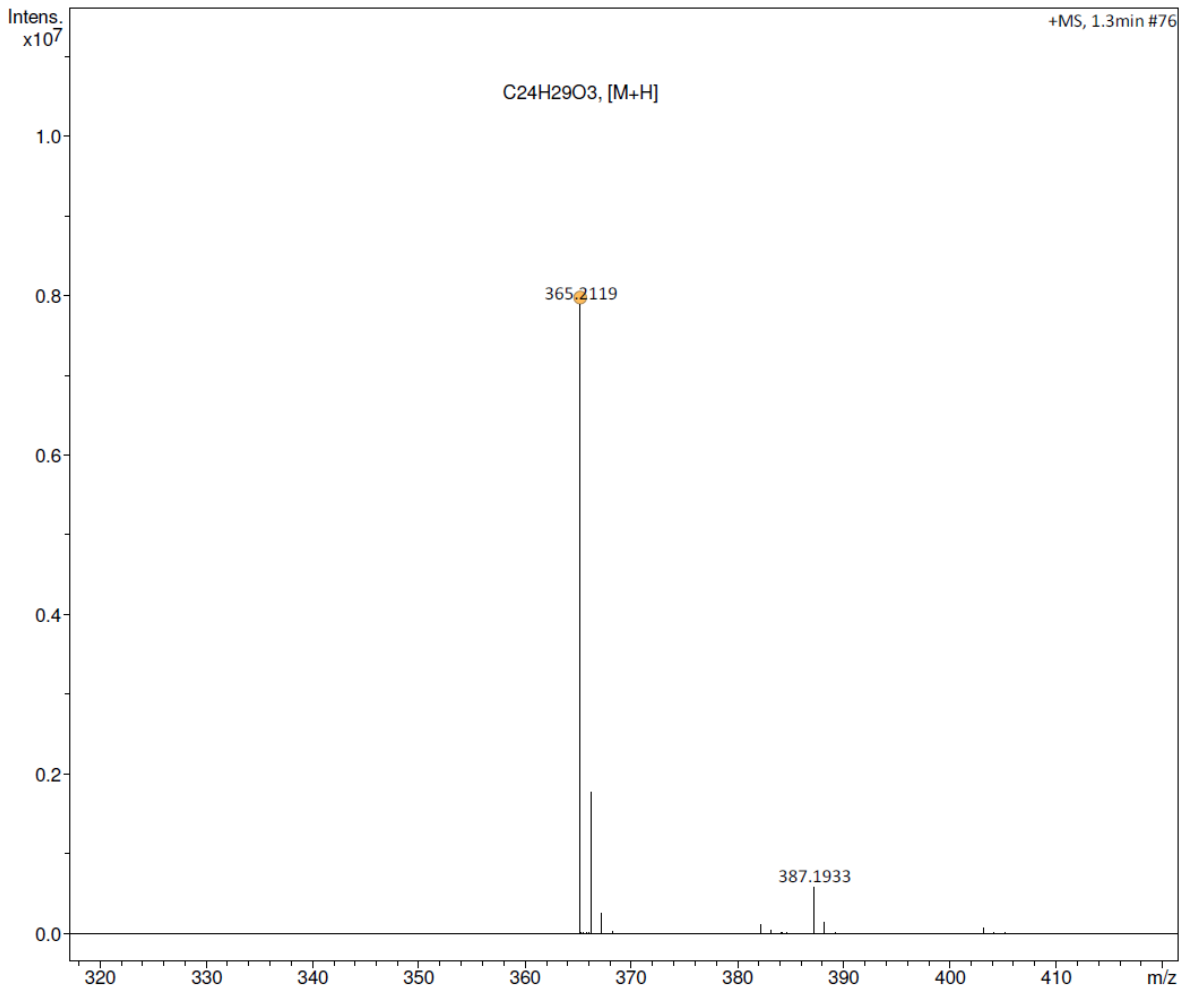

| Meas. m/z  | # | Ion Formula                                    | Score  | m/z        | err [mDa] | err [ppm] | mSigma | rdb  | e <sup>-</sup> | Conf | N-Rule | Adduct |
|------------|---|------------------------------------------------|--------|------------|-----------|-----------|--------|------|----------------|------|--------|--------|
| 365.211932 | 1 | C <sub>24</sub> H <sub>29</sub> O <sub>3</sub> | 100.00 | 365.211121 | -0.8      | -2.2      | 23.6   | 10.5 | even           |      | ok     | M+H    |

GA4\_01\_2317.d

Bruker Compass DataAnalysis 4.2

printed: 2/15/2021 12:39:26 PM

by: CIF

Page 1 of 1

**HR-MS spectrum of XD-8**

## SAMPLE INFORMATION

|                   |                         |                     |                                |
|-------------------|-------------------------|---------------------|--------------------------------|
| Sample Name:      | 8                       | Acquired By:        | System                         |
| Sample Type:      | Unknown                 | Sample Set Name:    | 09042021                       |
| Vial:             | 9                       | Acq. Method Set:    | CIF                            |
| Injection #:      | 1                       | Processing Method:  | 8                              |
| Injection Volume: | 10.00 ul                | Channel Name:       | PDA Max Plot 190.0 - 800.0     |
| Run Time:         | 10.0 Minutes            | Proc. Chnl. Descr.: | W2996 PDA MaxPlot (190.0 nm to |
| Date Acquired:    | 09-04-2021 16:11:37 IST |                     |                                |
| Date Processed:   | 09-04-2021 17:59:07 IST |                     |                                |

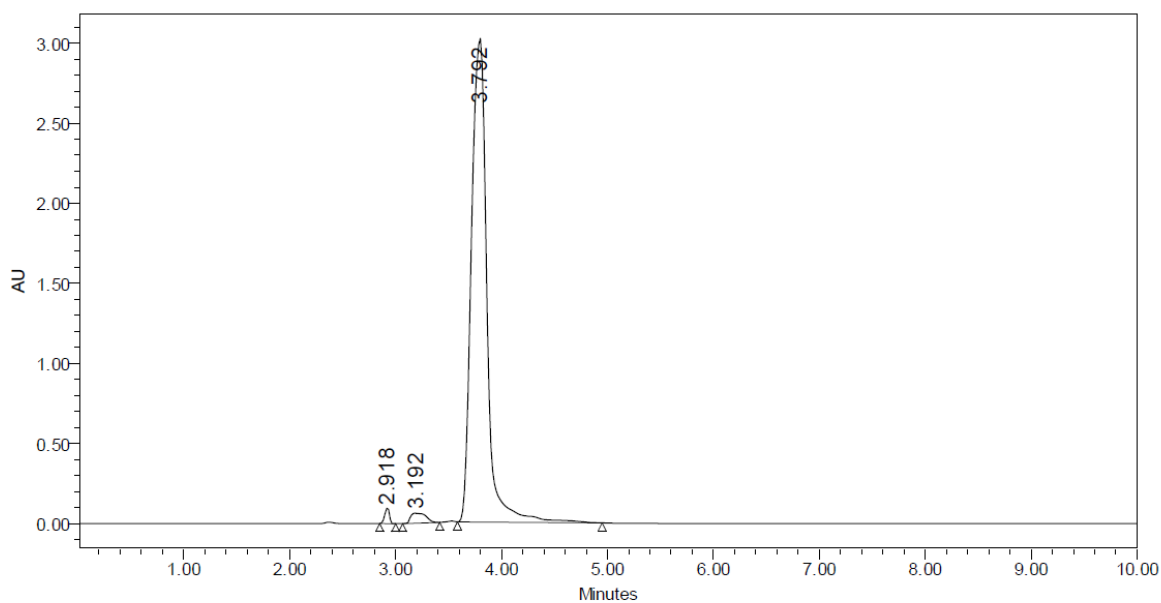

|   | RT    | Area     | % Area | Height  |
|---|-------|----------|--------|---------|
| 1 | 2.918 | 299708   | 0.95   | 94347   |
| 2 | 3.192 | 623926   | 1.97   | 63364   |
| 3 | 3.792 | 30745238 | 97.08  | 3032285 |

Reported by User: System  
Report Method: S P PUNE UNIVERSITY  
Report Method ID 2116  
Page: 1 of 1

Project Name: Defaults\1.8  
Date Printed:  
09-04-2021  
17:59:21 Asia/Kolkata

## HPLC spectrum of XD-8

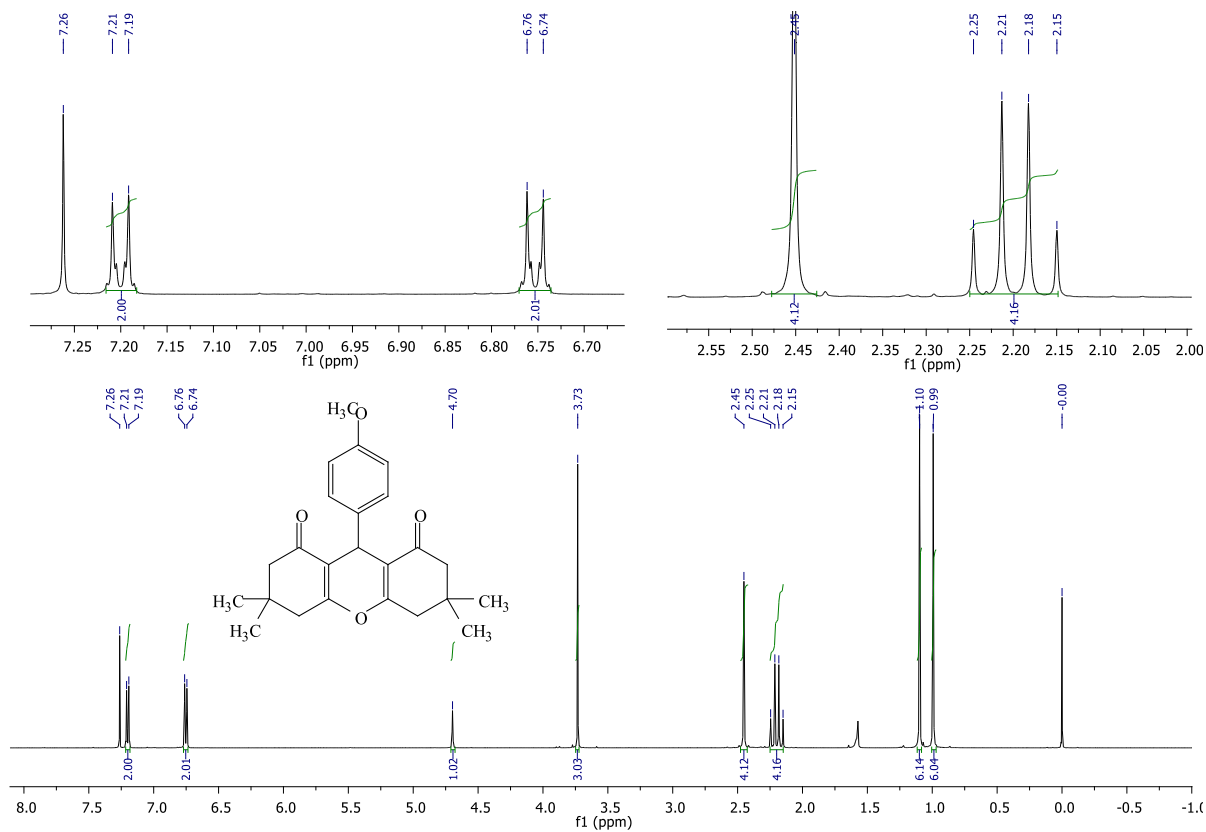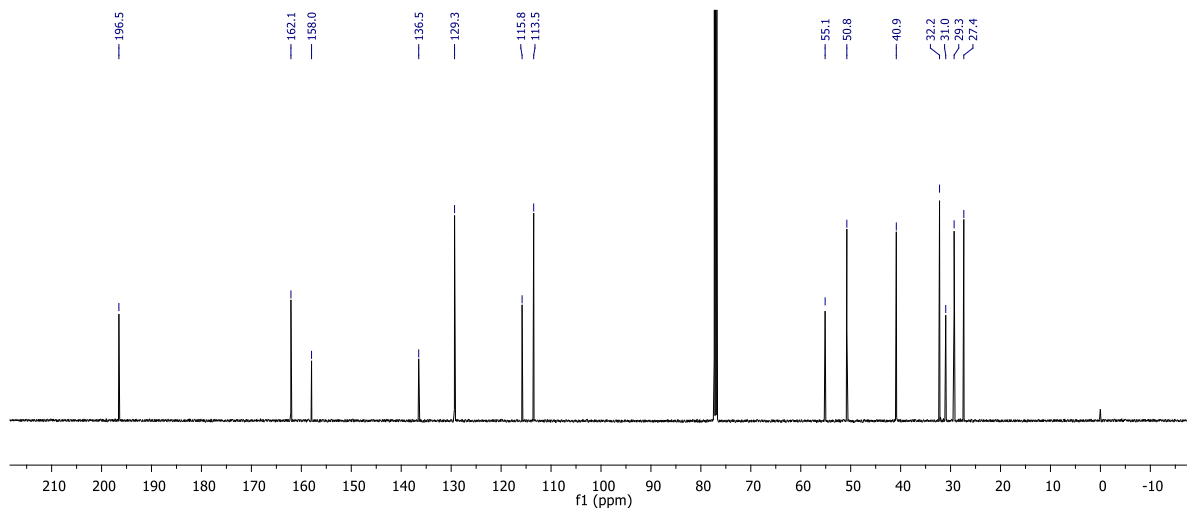

**Savitribai Phule Pune University - Central Instrumentation Facility**

**Analysis Info**

|               |                                                       |                  |                         |
|---------------|-------------------------------------------------------|------------------|-------------------------|
| Analysis Name | D:\Data\2021\SPPU\CIF\Umesh\06022021\04_GC1_01_2323.d | Acquisition Date | 2/6/2021 8:15:09 PM     |
| Method        | dlc_ms50-800mz_10min_0.120mlflow_90b.m                | Operator         | CIF                     |
| Sample Name   | 04                                                    | Instrument       | impact HD 1819696.00184 |
| Comment       |                                                       |                  |                         |

**Acquisition Parameter**

|             |         |                      |          |                  |           |
|-------------|---------|----------------------|----------|------------------|-----------|
| Source Type | ESI     | Ion Polarity         | Positive | Set Nebulizer    | 1.7 Bar   |
| Focus       | Active  | Set Capillary        | 4500 V   | Set Dry Heater   | 200 °C    |
| Scan Begin  | 50 m/z  | Set End Plate Offset | -500 V   | Set Dry Gas      | 7.0 l/min |
| Scan End    | 800 m/z | Set Charging Voltage | 2000 V   | Set Divert Valve | Source    |
|             |         | Set Corona           | 0 nA     | Set APCI Heater  | 0 °C      |

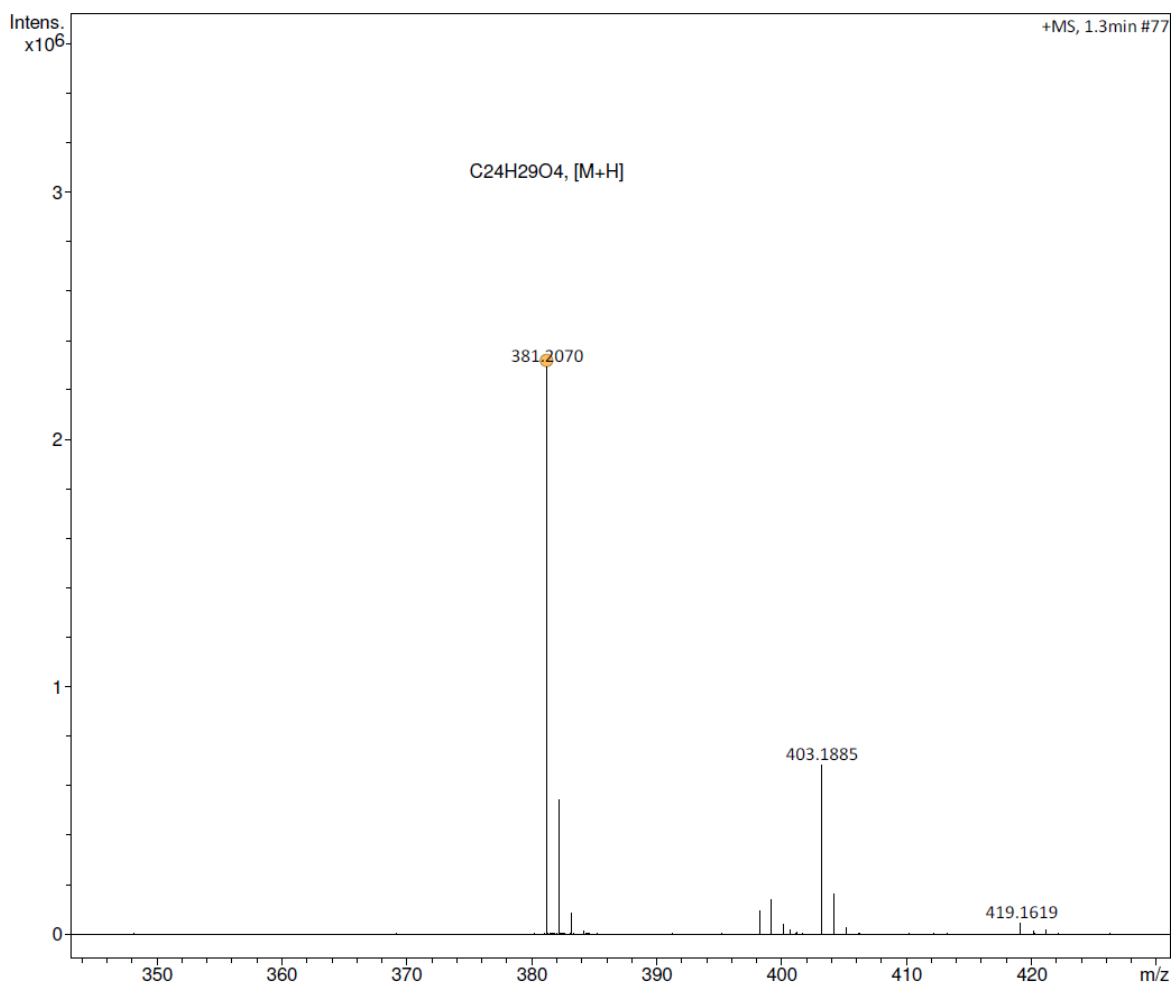

| Meas. m/z  | # | Ion Formula | Score  | m/z        | err [mDa] | err [ppm] | mSigma | rdb  | e <sup>-</sup> | Conf | N-Rule | Adduct |
|------------|---|-------------|--------|------------|-----------|-----------|--------|------|----------------|------|--------|--------|
| 381.206983 | 1 | C24H29O4    | 100.00 | 381.206036 | -0.9      | -2.5      | 15.4   | 10.5 | even           |      | ok     | M+H    |

GC1\_01\_2323.d

Bruker Compass DataAnalysis 4.2

printed: 2/15/2021 12:53:39 PM

by: CIF

Page 1 of 1

**HR-MS spectrum of XD-9**

SAMPLE INFORMATION

|                   |                         |                     |                                |
|-------------------|-------------------------|---------------------|--------------------------------|
| Sample Name:      | 9                       | Acquired By:        | System                         |
| Sample Type:      | Unknown                 | Sample Set Name:    | 09042021                       |
| Vial:             | 8                       | Acq. Method Set:    | CIF                            |
| Injection #:      | 1                       | Processing Method:  | 9                              |
| Injection Volume: | 10.00 ul                | Channel Name:       | PDA MaxPlot 190.0 - 800.0      |
| Run Time:         | 10.0 Minutes            | Proc. Chnl. Descr.: | W2996 PDA MaxPlot (190.0 nm to |
| Date Acquired:    | 09-04-2021 16:00:47 IST |                     |                                |
| Date Processed:   | 09-04-2021 17:57:56 IST |                     |                                |

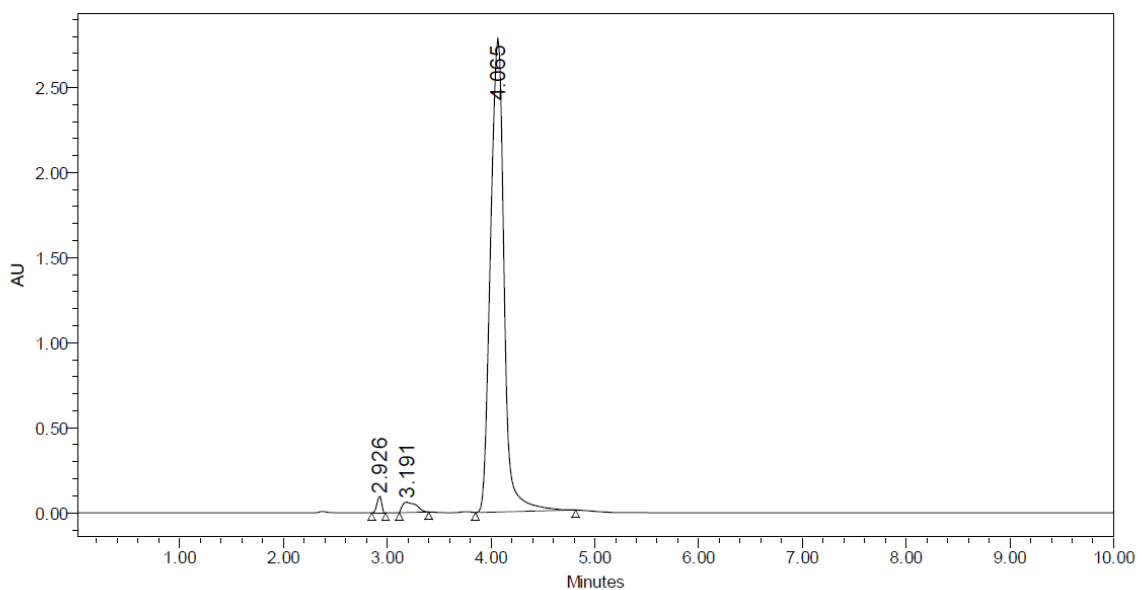

|   | RT    | Area     | % Area | Height  |
|---|-------|----------|--------|---------|
| 1 | 2.926 | 302273   | 1.16   | 92758   |
| 2 | 3.191 | 571596   | 2.19   | 61259   |
| 3 | 4.065 | 25241069 | 96.65  | 2786120 |

Reported by User: System  
 Report Method: S P PUNE UNIVERSITY  
 Report Method ID2116  
 Page: 1 of 1

Project Name: Defaults\1.8  
 Date Printed:  
 09-04-2021  
 17:58:11 Asia/Kolkata

HPLC spectrum of XD-9

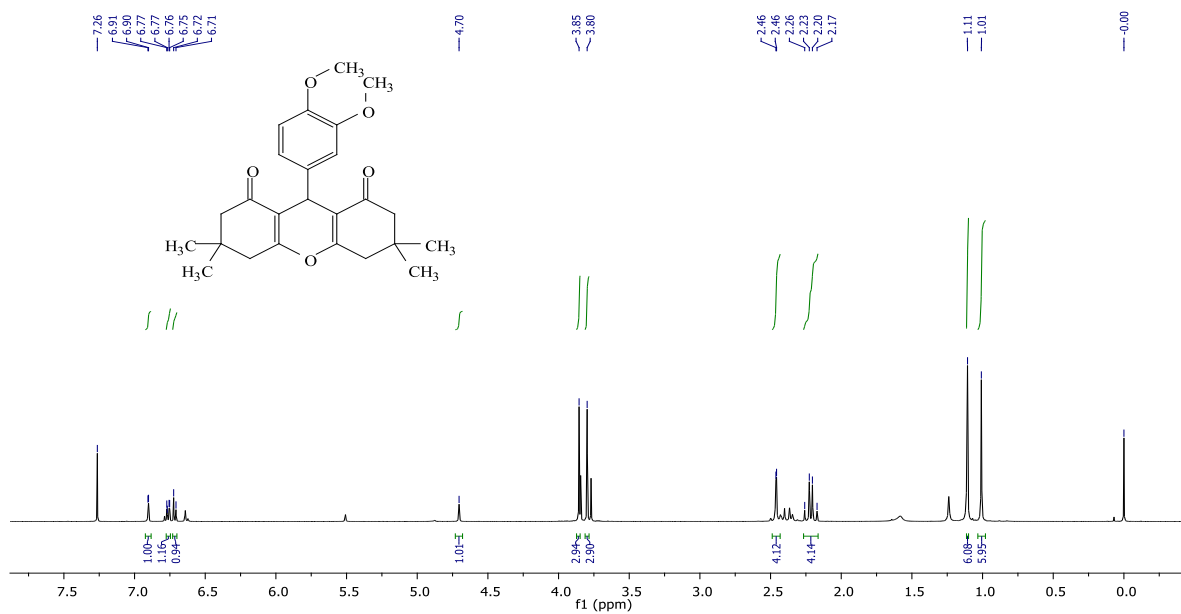

**<sup>1</sup>H NMR (500 MHz, CDCl<sub>3</sub>) of XD-10**

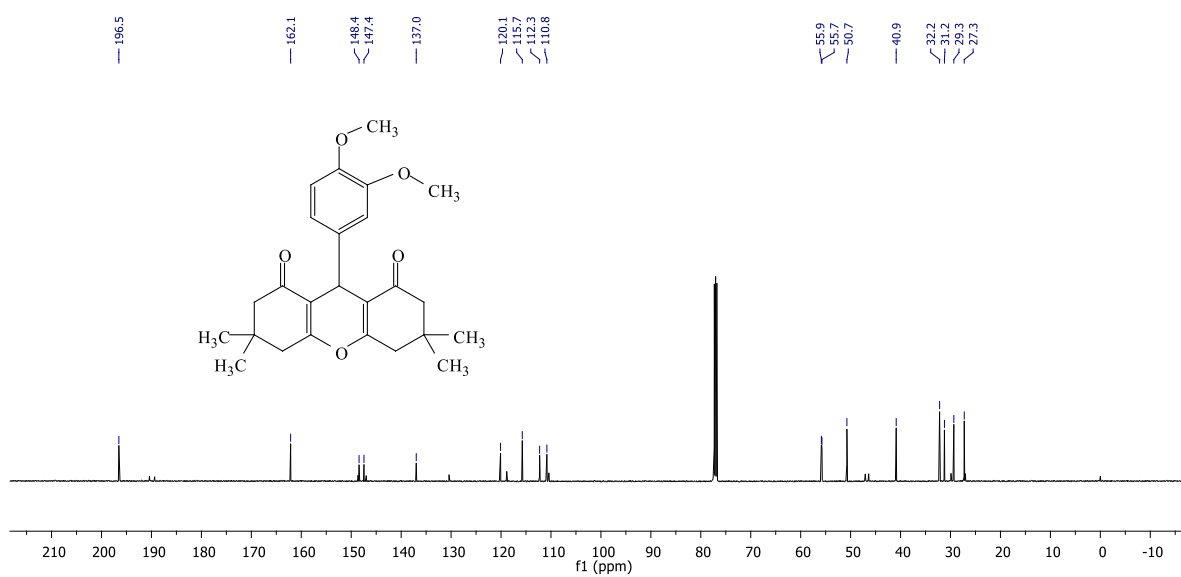

**<sup>13</sup>C NMR (125 MHz, CDCl<sub>3</sub>) of XD-10**

**Savitribai Phule Pune University - Central Instrumentation Facility**

**Analysis Info**

|               |                                                       |                  |                     |               |
|---------------|-------------------------------------------------------|------------------|---------------------|---------------|
| Analysis Name | D:\Data\2021\SPPU\CIF\Umesh\06022021\09_GA2_01_2315.d | Acquisition Date | 2/6/2021 6:49:43 PM |               |
| Method        | dlc_ms50-800mz_10min_0.120mlflow_90b.m                | Operator         | CIF                 |               |
| Sample Name   | 09                                                    | Instrument       | impact HD           | 1819696.00184 |
| Comment       |                                                       |                  |                     |               |

**Acquisition Parameter**

|             |         |                      |          |                  |           |
|-------------|---------|----------------------|----------|------------------|-----------|
| Source Type | ESI     | Ion Polarity         | Positive | Set Nebulizer    | 1.7 Bar   |
| Focus       | Active  | Set Capillary        | 4500 V   | Set Dry Heater   | 200 °C    |
| Scan Begin  | 50 m/z  | Set End Plate Offset | -500 V   | Set Dry Gas      | 7.0 l/min |
| Scan End    | 800 m/z | Set Charging Voltage | 2000 V   | Set Divert Valve | Source    |
|             |         | Set Corona           | 0 nA     | Set APCI Heater  | 0 °C      |

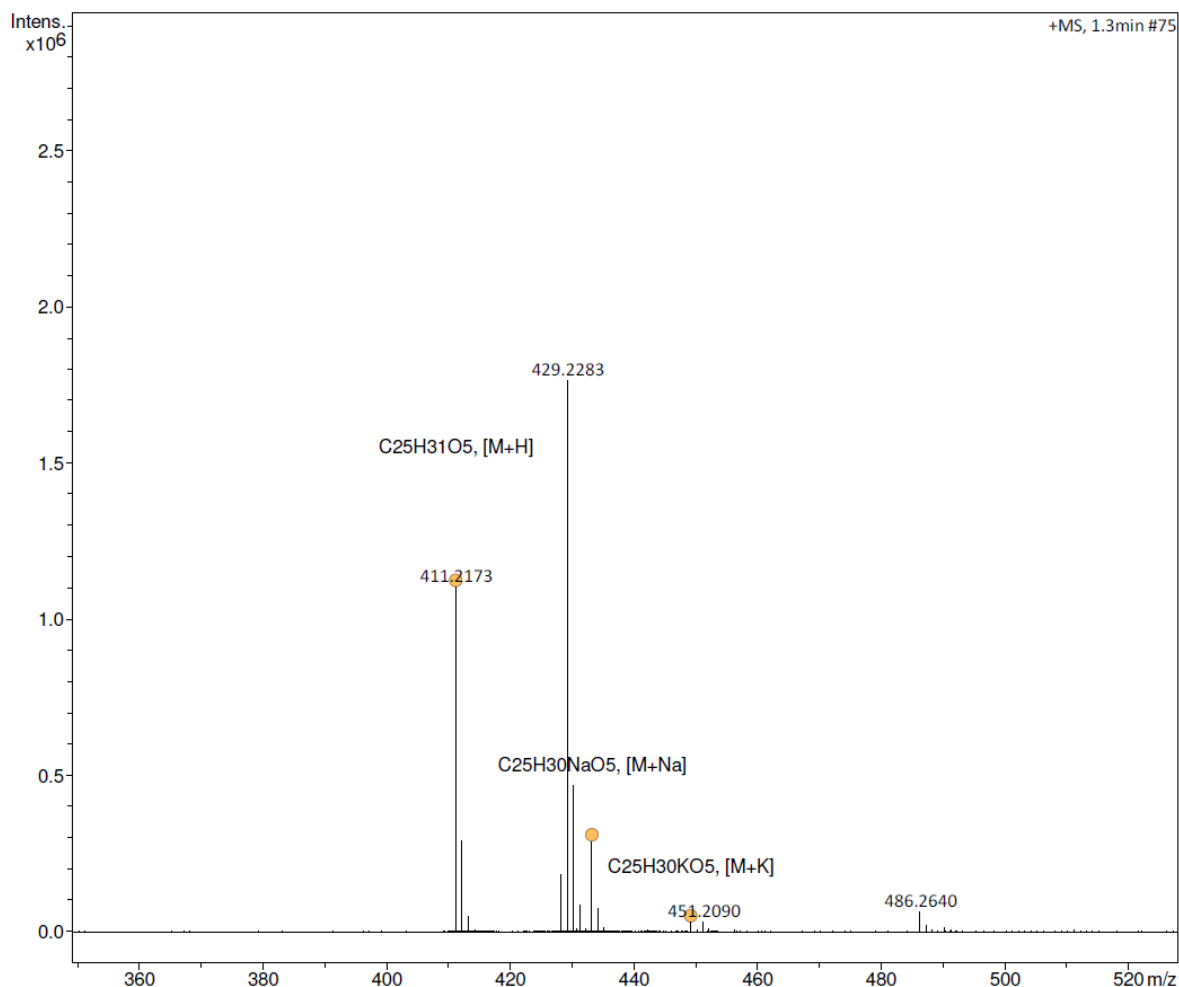

| Meas. m/z  | # | Ion Formula | Score  | m/z        | err [mDa] | err [ppm] | mSigma | rdb  | e <sup>-</sup> | Conf | N-Rule | Adduct |
|------------|---|-------------|--------|------------|-----------|-----------|--------|------|----------------|------|--------|--------|
| 411.217319 | 1 | C25H31O5    | 100.00 | 411.216601 | -0.7      | -1.7      | 7.9    | 10.5 | even           |      | ok     | M+H    |
| 433.198897 | 1 | C25H30NaO5  | 100.00 | 433.198545 | -0.4      | -0.8      | 14.2   | 10.5 | even           |      | ok     | M+Na   |
| 449.172708 | 1 | C25H30KO5   | 100.00 | 449.172482 | -0.2      | -0.5      | 62.9   | 10.5 | even           |      | ok     | M+K    |

GA2\_01\_2315.d

Bruker Compass DataAnalysis 4.2

printed: 2/15/2021 1:15:16 PM

by: CIF

Page 1 of 1

**HR-MS spectrum of XD-10**



SAMPLE INFORMATION

|                   |                         |                     |                                |
|-------------------|-------------------------|---------------------|--------------------------------|
| Sample Name:      | 10                      | Acquired By:        | System                         |
| Sample Type:      | Unknown                 | Sample Set Name:    | 09042021                       |
| Vial:             | 20                      | Acq. Method Set:    | CIF                            |
| Injection #:      | 1                       | Processing Method:  | 10                             |
| Injection Volume: | 10.00 ul                | Channel Name:       | PDA Max Plot 190.0 - 800.0     |
| Run Time:         | 10.0 Minutes            | Proc. Chnl. Descr.: | W2996 PDA MaxPlot (190.0 nm to |
| Date Acquired:    | 09-04-2021 13:49:07 IST |                     |                                |
| Date Processed:   | 09-04-2021 17:54:47 IST |                     |                                |

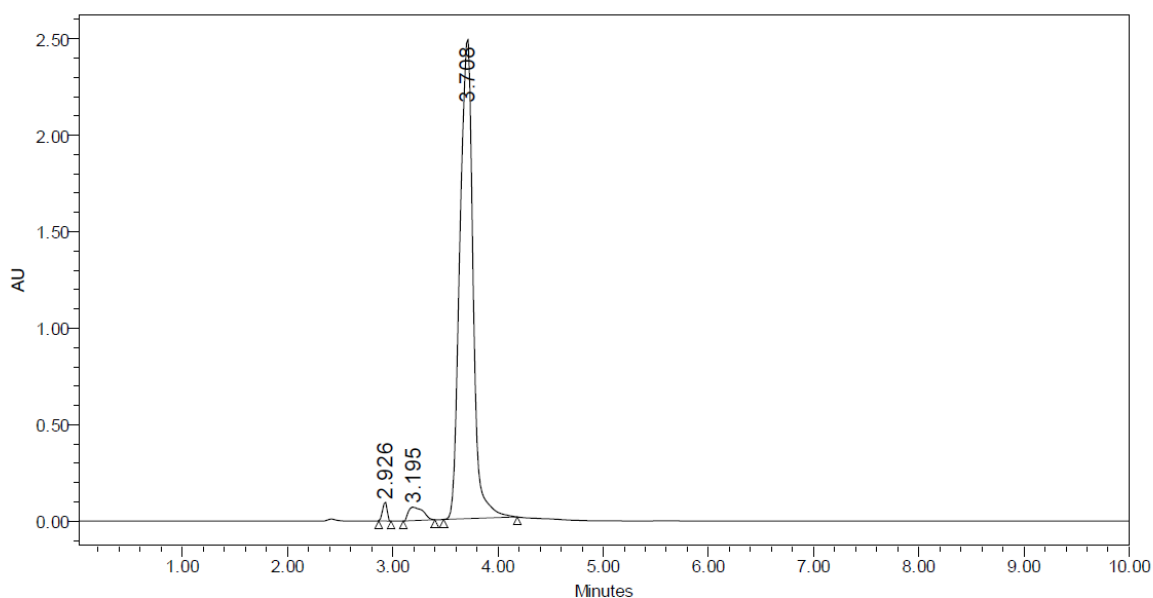

|   | RT    | Area     | % Area | Height  |
|---|-------|----------|--------|---------|
| 1 | 2.926 | 297103   | 1.32   | 92538   |
| 2 | 3.195 | 667762   | 2.96   | 70726   |
| 3 | 3.708 | 21587550 | 95.72  | 2508969 |

Reported by User: System  
 Report Method: S P PUNE UNIVERSITY  
 Report Method ID2116  
 Page: 1 of 1

Project Name: Defaults\1.8  
 Date Printed:  
 09-04-2021  
 17:55:01 Asia/Kolkata

HPLC spectrum of XD-10

## Molecular Docking Study

The important non-bonded interactions between protein and ligands, derived from molecular docking studies. [A = Protein chain, B = Ligand atoms]

| XD-2        |          |               |                       |
|-------------|----------|---------------|-----------------------|
| Atom1       | Atom2    | Category      | Types                 |
| A:ILE223:HN | B:XDE1:O | Hydrogen Bond | Conventional Hydrogen |
| A:TYR225:HH | B:XDE1:O | Hydrogen Bond | Conventional Hydrogen |
| A:TYR225    | B:XDE1   | Hydrophobic   | Pi-Pi Stacked         |
| B:XDE1:C    | A:ILE12  | Hydrophobic   | Alkyl                 |
| A:TYR84     | B:XDE1:C | Hydrophobic   | Pi-Alkyl              |

  
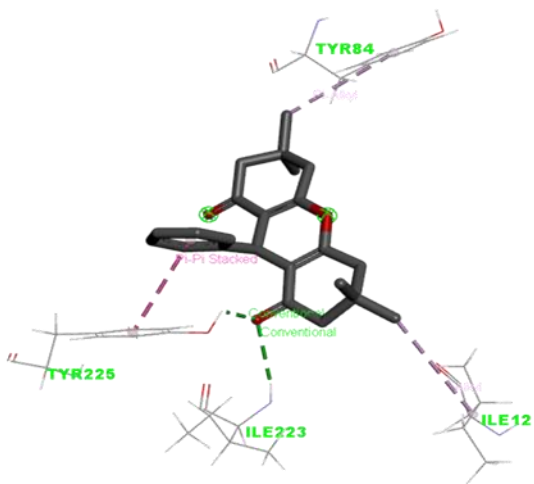

| XD-4        |          |               |                            |
|-------------|----------|---------------|----------------------------|
| Atom1       | Atom2    | Category      | Types                      |
| A:THR222:HN | B:XDG1:O | Hydrogen Bond | Conventional Hydrogen Bond |
| A:ILE223:HN | B:XDG1:O | Hydrogen Bond | Conventional Hydrogen Bond |
| A:THR221:HA | B:XDG1:O | Hydrogen Bond | Carbon Hydrogen Bond       |
| B:XDG1:C    | A:ARG120 | Hydrophobic   | Alkyl                      |
| B:XDG1:C    | A:ILE12  | Hydrophobic   | Alkyl                      |
| B:XDG1:C    | A:ILE30  | Hydrophobic   | Alkyl                      |
| B:XDG1:C    | A:ARG120 | Hydrophobic   | Alkyl                      |
| B:XDG1:C    | A:ILE305 | Hydrophobic   | Alkyl                      |
| A:TYR225    | B:XDG1:C | Hydrophobic   | Pi-Alkyl                   |
| B:XDG1      | A:ILE223 | Hydrophobic   | Pi-Alkyl                   |

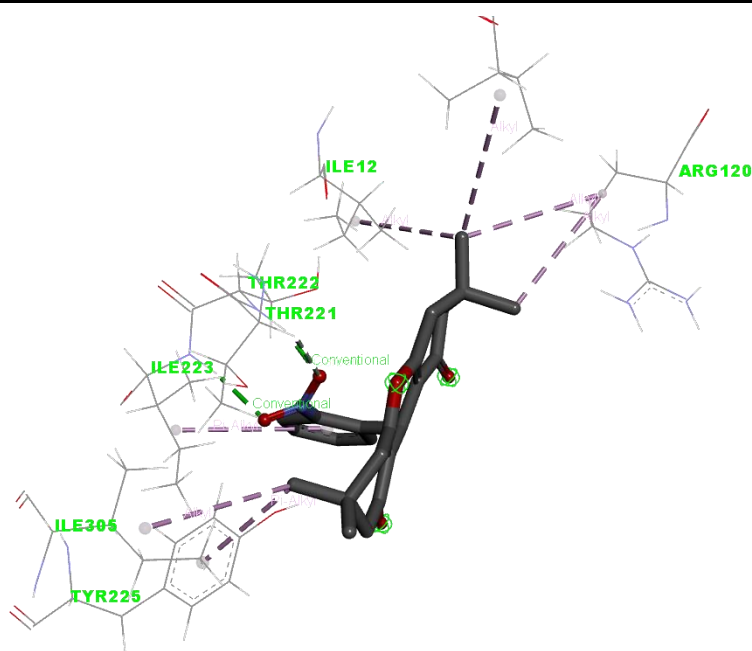

| XD-5        |           |               |                            |
|-------------|-----------|---------------|----------------------------|
| Atom1       | Atom2     | Category      | Types                      |
| A:TYR225:HH | B:XDF1:O  | Hydrogen Bond | Conventional Hydrogen Bond |
| A:TYR225    | B:XDF1    | Hydrophobic   | Pi-Pi Stacked              |
| B:XDF1:C    | A:ILE12   | Hydrophobic   | Alkyl                      |
| A:TRP51     | B:XDF1:C  | Hydrophobic   | Pi-Alkyl                   |
| A:TYR84     | B:XDF1:C  | Hydrophobic   | Pi-Alkyl                   |
| A:TYR225    | B:XDF1:CL | Hydrophobic   | Pi-Alkyl                   |

  

The 3D molecular model illustrates the binding of the XD-5 ligand to a protein. The ligand is shown in a stick representation with a semi-transparent surface. Key interactions are highlighted with dashed lines: a green dashed line represents a conventional hydrogen bond between the hydroxyl group of TYR225 and the carbonyl oxygen of XDF1. Purple dashed lines indicate hydrophobic interactions: pink lines for Pi-Pi stacked interactions between the aromatic rings of TYR225 and XDF1; magenta lines for Pi-Alkyl interactions between the aromatic rings of TYR225, TYR84, and TRP51 and the aliphatic chains of XDF1; and green lines for Alkyl interactions between the aliphatic chains of XDF1 and the side chains of ILE12 and TYR225.

| XD-6        |          |               |                            |
|-------------|----------|---------------|----------------------------|
| Atom1       | Atom2    | Category      | Types                      |
| A:TYR225:HH | B:XDB1:O | Hydrogen Bond | Conventional Hydrogen Bond |
| A:TYR225    | B:XDB1   | Hydrophobic   | Pi-Pi Stacked              |
| B:XDB1:C    | A:ILE12  | Hydrophobic   | Alkyl                      |
| A:TRP51     | B:XDB1:C | Hydrophobic   | Pi-Alkyl                   |
| A:TYR84     | B:XDB1:C | Hydrophobic   | Pi-Alkyl                   |

## Molecular Dynamics Simulation

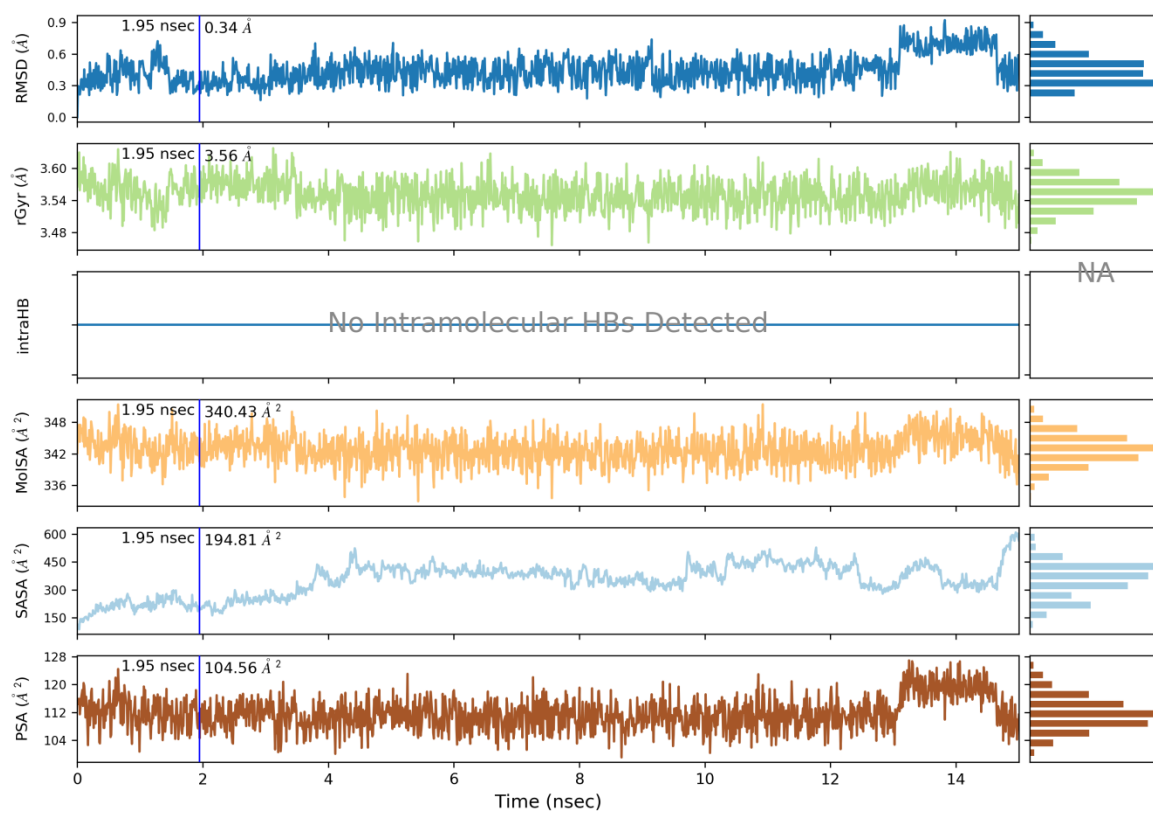

**Fig. S3** Different properties of **XD-4** ligand

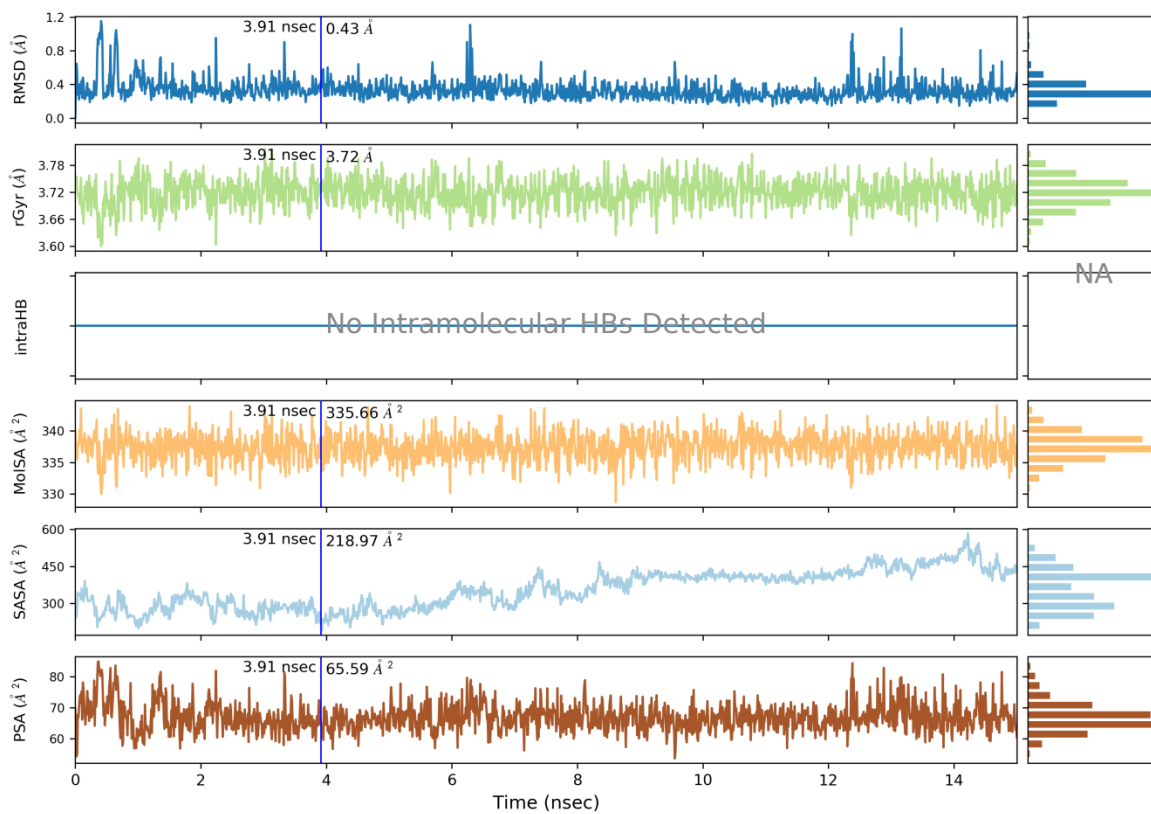

**Fig. S4** Different properties of XD-6 ligand
